1        **Integrative small and long RNA-omics analysis of human healing and non-**  
2        **healing wounds discovers cooperating microRNAs as therapeutic targets**

3

4        Zhuang Liu<sup>1,6</sup>, Letian Zhang<sup>1,6</sup>, Maria A. Toma<sup>1</sup>, Dongqing Li<sup>1,2</sup>, Xiaowei Bian<sup>1</sup>, Irena Pastar<sup>3</sup>, Marjana  
5        Tomic-Canic<sup>3</sup>, Pehr Sommar<sup>4\*</sup> and Ning Xu Landén<sup>1,5\*</sup>

6

7        <sup>1</sup>Dermatology and Venereology Division, Department of Medicine Solna, Center for Molecular Medicine,  
8        Karolinska Institutet, 17176 Stockholm, Sweden

9        <sup>2</sup>Institute of Dermatology, Chinese Academy of Medical Sciences and Peking Union Medical College,  
10        Nanjing, Jiangsu, China

11        <sup>3</sup>Wound Healing and Regenerative Medicine Research Program, Dr Phillip Frost Department of  
12        Dermatology and Cutaneous Surgery, University of Miami Miller School of Medicine, Miami, FL, USA.

13        <sup>4</sup>Department of Plastic and Reconstructive Surgery, Karolinska University Hospital, Stockholm, Sweden

14        <sup>5</sup>Ming Wai Lau Centre for Reparative Medicine, Stockholm Node, Karolinska Institute, 17177 Stockholm,  
15        Sweden

16

17        <sup>6</sup>Equal contribution

18        \*Co-senior authors

19        To whom correspondence should be addressed: Email: ning.xu@ki.se or  
20        pehr.sommar@regionstockholm.se

21 **Abstract**

22 MicroRNAs (miR) are important posttranscriptional regulators and exhibit a high potential to be utilized  
23 in diagnosis and therapy. However, our insufficient knowledge of the miR-mediated gene regulation in  
24 human skin wound healing severely hinders the identification of clinically relevant miRs. Here, we  
25 performed paired small RNA and long RNA sequencing in human tissue samples, including matched  
26 skin and acute wounds collected at each healing stage and chronic non-healing venous ulcers (VU).  
27 With integrative small and long RNA-omics analysis, we developed a compendium  
28 (<https://www.xulandenlab.com/humanwounds-mirna-mrna>), which will be an open, comprehensive  
29 resource to broadly aid wound healing research. With this first clinical, wound-centric resource of miRs  
30 and mRNAs, we identified 17 pathologically relevant miRs that exhibited abnormal VU expression and  
31 displayed their targets enriched explicitly in the VU gene signature. Intermeshing regulatory networks  
32 controlled by these miRs revealed their high cooperativity in contributing to chronic wound pathology  
33 characterized by persistent inflammation and proliferative phase initiation failure. Furthermore, we  
34 demonstrated that miR-34a, miR-424, and miR-516, upregulated in VU, cooperatively suppressed  
35 keratinocyte growth while promoting inflammatory response. Collectively, our study opens the  
36 possibility of developing innovative wound treatment that targets pathologically relevant cooperating  
37 miRs to attain higher therapeutic efficacy and specificity.

38

39

40 **Keywords:** microRNA, regulatory network, wound healing, chronic wound, venous ulcer

41

42

## 43 **Introduction**

44 Wound healing is a fundamental biological process comprising three sequential and overlapping phases,  
45 i.e., inflammation, proliferation, and remodeling(Reinke & Sorg, 2012). This delicate repair process is  
46 often disrupted in chronic venous insufficiency patients, resulting in venous ulcers (VU) characterized  
47 by persistent inflammation and proliferative phase initiation failure(Eming et al., 2014). VU is the most  
48 common chronic non-healing wound type, comprising 45–60% of all lower extremity ulcerations(Vivas  
49 et al., 2016). VU exhibits a marked impact on health-related life quality and represents a significant  
50 financial burden both to the patients and the society with an annual health care cost of overall \$14.9  
51 billion in the USA(Hoversten et al., 2020). A deeper understanding of the underlying gene expression  
52 regulatory mechanisms during physiological and pathological wound repair is essential for developing  
53 more effective wound treatments(Stone et al., 2017).

54 MicroRNAs (miR) represent a group of short (~22 nt) non-coding ribonucleic acids, incorporating into  
55 the RNA-induced silencing complex and binding to the 3' untranslated region of their target mRNAs,  
56 resulting in mRNA destabilization and translational repression(Stavast & Erkeland, 2019). Given that  
57 an individual miR can target dozens to hundreds of genes, miRs have been identified as regulators of  
58 complex gene networks(Stavast & Erkeland, 2019). MiR-mediated regulation is reportedly crucial in  
59 multiple fundamental biological processes including skin wound repair(Herter & Xu Landen, 2017; Meng  
60 et al., 2018). Importantly, manipulating miRs critical for the disease pathogenesis could offer a  
61 prominent therapeutic effect, supported by viral infection- and cancer-targeting miR therapeutics clinical  
62 trials(Rupaimoole & Slack, 2017). Therefore, miR-based therapeutics for hard-to-heal wounds  
63 represent a promising approach(Herter & Xu Landen, 2017; Luan et al., 2018; Meng et al., 2018; Nie  
64 et al., 2020; Pastar et al., 2021; Sen & Roy, 2012).

65 However, our insufficient knowledge of the miR-mediated gene regulation in human wounds severely  
66 hinders the identification of clinically relevant miRs and their potential therapeutic use. While most  
67 previous wound healing-related miR studies rely on *in vitro* or animal models, only a few have  
68 approached miR profiles in human wound tissues or primary cells from patients, including tissues and  
69 fibroblasts of diabetic foot ulcers(Liang et al., 2016; Ramirez et al., 2018), burn wound dermis(Liang et  
70 al., 2012), and acute wounds at the inflammatory phase(Li et al., 2015). Despite sharing several  
71 fundamental features, the human skin structure and repair processes are different from those of the  
72 commonly used animal models (e.g., rodents)(Elliot et al., 2018). Moreover, animal models cannot fully

73 simulate the human disease complexity, and the findings are difficult to extrapolate to humans(Darwin  
74 & Tomic-Canic, 2018; Pastar et al., 2018). Thereby, a rigorous and in-depth characterization of miR-  
75 mediated gene regulatory networks in human healing and non-healing wounds is timely needed.

76 In this study, we performed paired small and mRNA expression profiling in the human skin, acute  
77 wounds during the inflammatory and proliferative phases, and VU, unraveling time-resolved changes  
78 of the whole transcriptome throughout the wound healing process and the unique gene expression  
79 signature of a common chronic wound type. The integrative miR and mRNA omics analysis provides a  
80 network view of miR-mediated gene regulation in human wounds *in vivo* and demonstrates the  
81 functional involvement of miRs in human skin wound repair at the system level. Importantly, we  
82 identified miRs highly relevant to VU pathology, based not only on their aberrant expression but also  
83 their targetome enriched in the VU-related gene expression signature. Apart from confirming the *in silico*  
84 findings, the experimental miR expression, targetome, and function validation uncovered that VU-  
85 dysregulated miRs could act cooperatively contributing to the stalled wound healing characterized by  
86 failed transition from inflammatory-to-proliferative phase, which opens up new possibility for the  
87 development of more precise and innovative wound treatment targeting pathologically-relevant  
88 cooperating miRs to achieve higher therapeutic efficacy and specificity. Additionally, based on this  
89 comprehensive analysis of human wound tissues, we built a browsable resource web portal  
90 (<https://www.xulandenlab.com/humanwounds-mirna-mrna>), which is the first wound healing-focused  
91 miR resource for facilitating the exploration of miR's clinical application and for aiding in the elucidation  
92 of posttranscriptional regulatory underpinnings of tissue repair.

93

## 94 **Materials and Methods**

### 95 **Human wound samples**

96 Human wound biopsies were obtained from 10 healthy donors and 12 patients with chronic venous  
97 ulcer (VU) at the Karolinska University Hospital Solna (Stockholm, Sweden). Donor demographics are  
98 presented in **Table 1**. Patients with VUs, which persisted for more than four months despite  
99 conventional therapy, were enrolled in this study (**Table 2**). Tissue samples were collected from the  
100 lower extremity at the nonhealing edges of the ulcers by using a four-mm biopsy punch (**Figure 1a**).  
101 Healthy donors above 60 years old without skin diseases, diabetes, unstable heart disease, infections,  
102 bleeding disorder, immune suppression, and any ongoing medical treatments were recruited (**Table 3**).

103 Two full-thickness excisional wounds (4 mm in diameter) were created at the lower extremity on each  
104 donor, and the excised skin was saved as intact skin control (Skin). The wound-edges were excised  
105 with a six mm-biopsy punch at day one (Wound1) and day seven (Wound7) after wounding (**Figure 1a**).  
106 Written informed consent was obtained from all the donors to collect and use the tissue samples. The  
107 study was approved by the Stockholm Regional Ethics Committee and conducted according to the  
108 Declaration of Helsinki's principles.

### 109 **RNA extraction, library preparation, and sequencing**

110 RNA extraction Snap frozen tissue samples were homogenized with the TissueLyser LT (Qiagen), and  
111 total RNA was isolated using the miRNeasy Mini kit (Qiagen). RNA quality and quantity were determined  
112 by using Agilent 2100 Bioanalyzer (Agilent Technologies) and Nanodrop 1000 (Thermo Fisher Scientific  
113 Inc.), respectively.

114  
115 Small RNA library preparation and sequencing The small RNA sequencing libraries were constructed  
116 using 3 µg total RNA per sample and NEB Next® Multiplex Small RNA Library Prep Set for Illumina®  
117 (NEB) following the manufacturer's recommendation. Briefly, total RNA was first ligated to adaptors at  
118 the 3' end by NEB 3' SR adaptor and 5' end by T4 RNA ligase followed by reverse transcription into  
119 cDNA using M-MuLV Reverse Transcriptase. PCR amplification of cDNA was performed using SR  
120 primers for Illumina and index primers. The PCR products were purified, and DNA fragments spanning  
121 from 140 to 160bp were recovered and quantified by DNA High Sensitivity Chips on the Agilent  
122 Bioanalyzer. The libraries were sequenced on an Illumina Hiseq 2500 platform (Illumina, Inc.) using  
123 single-end 50bp reads, and all samples were run side by side.

124  
125 mRNA library preparation and sequencing The long RNA sequencing libraries were constructed with a  
126 total amount of 2 µg RNA per sample. First, the ribosomal RNA was depleted by Epicentre Ribo-zero®  
127 rRNA Removal Kit (Epicentre). Second, strand-specific total-transcriptome RNA sequencing libraries  
128 were prepared by incorporating dUTPs in the second-strand synthesis step with NEB Next® Ultra™  
129 Directional RNA Library Prep Kit for Illumina® (NEB). Finally, the libraries were sequenced on an  
130 Illumina Hiseq 4000 platform, and 150 bp paired-end reads were generated for the following analysis.

131

## 132 **Analysis of miRNA-sequencing data**

133 Quality control, mapping, and quantification Quality of raw data was assessed using FastQC v0.11.8  
134 (<http://www.bioinformatics.babraham.ac.uk/projects/fastqc/>). We used mapper.pl module in the  
135 miRDeep2 v0.1.3 package(Friedlander et al., 2012; Mackowiak, 2011) to filter low-quality reads and  
136 remove sequencing adaptors and redundancies. Trimmed reads with lengths greater than 18  
137 nucleotides were mapped to GENCODE human reference genome (hg38) by the software Bowtie  
138 v1.2.2(Langmead et al., 2009). The miRDeep2.pl module was then performed with default parameters  
139 to identify known miRNAs, which were compared to miRNAs in miRBase release 22.1(Kozomara et al.,  
140 2018). Counts of reads mapped to each known mature miRNAs were acquired from the quantifier.pl  
141 module output without allowing mismatch. miRNAs with read counts less than five in more than half of  
142 twenty samples were discarded since these miRNAs are unlikely to give stable and robust results. Raw  
143 counts of 562 miRNAs were normalized for sequencing depth using TPM methods (transcript per million  
144 = mapped read count/total reads \* 10e6)(Zhou et al., 2010) and prepared for further analysis.

145 Differential expression (DE) analysis The DESeq2 workflow(Love et al., 2014) was carried out to fit raw  
146 counts to the negative binomial (NB) generalized linear model and to calculate the statistical  
147 significance of each miRNA in each comparison. In particular, the paired model was employed when  
148 comparing samples from the same donor. *P-values* obtained from the Wald test were corrected using  
149 Benjamini-Hochberg (BH) multiple test to estimate the false discovery rate (FDR). The differentially  
150 expressed miRNAs were defined as  $FDR < 0.05$  and  $|\log_2(\text{fold change})| \geq 1$ .

151 Principal component analysis (PCA) To explore the similarity of each sample, PCA was performed by  
152 using a DESeq2 built-in function *plotPCA* on the transformed data, in which the variances and size  
153 factors were stabilized and corrected. PCA and heatmaps were plotted by using *ggplot2*(Hadley, 2016)  
154 and *ComplexHeatmap*(Gu et al., 2016) packages in RStudio (<https://rstudio.com/>).

155 Weighted gene co-expression network analysis (WGCNA) The normalized expression of 562 miRNAs  
156 were used as input to the WGCNA R package(Langfelder & Horvath, 2008). First, we calculated the  
157 strength of pairwise correlations between miRNAs using the 'biweight' mid-correlation method. The  
158 function *pickSoftThreshold* was then employed to compute the optimized soft-thresholding power based  
159 on connectivity, which led to an approximately scale-free network topology(Zhang & Horvath, 2005).  
160 Second, a signed weighted co-expression network was constructed with a power of 18 using the one-

161 step *blockwiseModules* algorithm (**Figure 2 - figure supplement 2a**). Network modules were filtered  
162 according to parameters: *minModuleSize* = 10 and *mergeCutHeight* = 0.25.

163 The expression profile of each module was represented by the module eigengene (ME), referred to as  
164 the first principal component of all miRNAs in each module. Pearson correlations (values from -1 to 1)  
165 and the corresponding *P-values* between MEs and traits were computed. *P-values* were further  
166 adjusted to FDR across all the modules using the BH method. Modules significantly associated with  
167 each trait were selected by FDR < 0.05 and absolute correlation coefficients > 0.4. The module  
168 membership (also known as kME) of each miRNA was calculated by the correlations between miRNA  
169 expression and ME. MiRNAs with the highest kME values were defined as intra-modular hub miRNAs,  
170 and networks of hub miRNAs in significant modules were visualized using the Cytoscape v3.7.2  
171 software(Shannon et al., 2003).

172 To check the robustness of module definition, we carried out module preservation analysis and  
173 calculated the standardized Z-scores for each module by permutating 200 times using the same 20  
174 samples as reference and test datasets. Modular preservation is strong if Z-summary > 10, weak to  
175 moderate if 2 < Z-summary < 10, no evidence of preservation if Z-summary ≤ 2(Langfelder et al., 2011).

176 Transcription factor (TF) enrichment analysis We leveraged a curated database about TF-miRNA  
177 regulations, TransmiR v2.0(Tong et al., 2019), to identify the TFs regulating miRNA expression in each  
178 module. Fisher's exact tests were employed to evaluate the enrichment of each TF in the significant  
179 modules, and FDRs were adjusted to the total number of TFs (Odds ratio > 1 and FDR < 0.05).  
180 Correlations of gene expression between TFs and miRNA modules (represented by MEs) were further  
181 filtered to identify putative TF-mediated miRNA gene expression patterns (Pearson correlation: *P-value*  
182 < 0.05, coefficient > 0). The 562 miRNAs abundantly expressed in our samples were treated as the  
183 background dataset.

184

### 185 **Analysis of mRNA sequencing data**

186 Raw reads of mRNA sequencing were first trimmed for adaptors and low-quality bases using  
187 Trimmomatic v0.36 software(Bolger et al., 2014). Clean reads were aligned to the human reference  
188 genome (GRCh38.p12), coupled with the comprehensive gene annotation file (GENCODEv31) using  
189 STAR v2.7.1a(Dobin et al., 2013). Gene expression was then quantified by counting unique mapped

190 fragments to exons by using the feature count function from the Subread package(Liao et al., 2013).  
191 Raw counts for each gene were normalized to fragments per kilobase of a transcript, per million mapped  
192 reads (FPKM)-like values. Only mRNAs with FPKM  $\geq 1$  in at least ten samples were kept for the rest  
193 analysis. We used the same pipeline described above for mRNA DE and PCA analysis. The  
194 differentially expressed mRNAs were defined as FDR  $< 0.05$  and  $|\log_2(\text{fold change})| \geq 0.58$ . WGCNA  
195 was carried out for 12,069 mRNAs with the optimal threshold power of 12 according to a fit to the scale-  
196 free topology of the co-expression network (**Figure 2 - figure supplement 4a**). Thirteen mRNA  
197 modules were identified with the settings: *maxBlockSize* = 20000, *minModuleSize* = 100 and  
198 *mergeCutHeight* = 0.25. Furthermore, mRNA module-enriched TF analysis was performed with a  
199 manually curated TF-target regulatory relationship database, TRRUST v2(Han et al., 2018), using  
200 Fisher's exact tests. TFs with FDR  $< 0.05$  and odds ratio  $> 1$  and the expression significantly correlated  
201 with respective mRNA modules (Pearson correlation *P-value*  $< 0.05$ ) were identified.

202 Gene ontology (GO) analysis We carried out GO analysis for mRNAs by using the WebGestalt tool  
203 (<http://www.webgestalt.org/>)(Liao et al., 2019), which applied a hypergeometric test in target and  
204 reference gene sets. GO terms of non-redundant biological process (BP) with gene number less than  
205 10 and adjust *P-value* (FDR)  $> 0.05$  were filtered out.

206

## 207 **Integrative analysis of miRNA and mRNA expression changes in wound healing**

208 Expression correlation between mRNA and miRNA modules An integrative analysis was carried out by  
209 relating the first principal component (PC1) of miRNA expression, calculated using the  
210 *moduleEigengenes* function of WGCNA package(Langfelder & Horvath, 2008), to the PC1 of mRNA  
211 expression in each module. The miRNA-mRNA module pairs with a Pearson correlation coefficient  $< -$   
212 0.5 and a *P-value*  $< 0.05$  were selected for the following enrichment analysis.

213 Prediction of miRNA targets We predicted both conserved and non-conserved target sites for all the  
214 562 miRNAs by using the *get\_multimir* function from R package multimir(Ru et al., 2014)  
215 (<http://multimir.org/>) based on the latest TargetScan v7.2 database(Agarwal et al., 2015; Lewis et al.,  
216 2005). All predicted miRNA targets were sorted by a primary score calculated for target site strength,



217 and the top 25% with summed context++ score  $\leq -0.15$  were defined as the strongest miRNA targets.  
218 Targets that were not detected by the long RNA-seq were removed.

219 Gene set enrichment analysis of miRNA targets in mRNA modules. We evaluated the degree of  
220 enrichment of miRNA modules' targets in mRNA modules. For this, we focused on the VU-specific DE  
221 miRNA, i.e., the 22 up- and 10 down-regulated miRNAs in VU compared to both the skin and acute  
222 wounds (FDR  $< 0.05$  and  $|\log_2(\text{fold change})| \geq 1$ ), as well as the VU-associated modules' hub miRNAs,  
223 which kME values were greater than the median kME in respective modules (i.e., 14 miRNAs in m8, 9  
224 miRNAs in m12, 20 miRNAs in m7, 29 miRNAs in m3, and 13 miRNAs in m9). Among these miRNAs'  
225 strongest targets, we selected the ones that were hit by  $\geq 2$  miRNAs from m8, m9, m12 modules or  
226 miRNAs downregulated in VU;  $\geq 3$  miRNAs from m7 module or miRNAs upregulated in VU;  $\geq 4$  miRNAs  
227 from m3 module, to capture putative module-driving targets. We performed gene set enrichment  
228 analyses for these miRNAs' targets in VU-specific DE mRNAs (FDR  $< 0.05$  and fold change  $\geq 1.5$ ) and  
229 VU-associated mRNA modules by using the R function *fisher.test()* based on the two-side Fisher's exact  
230 test (Wu et al., 2016). Furthermore, we performed enrichment analysis to identify individual miRNA with  
231 their strongest targets significantly enriched in VU-specific DE mRNAs or VU-associated mRNA  
232 modules (Fisher's exact test: odds ratio  $> 1$ , *P-value*  $< 0.05$ ).

233

## 234 **Experimental validation of miRNAs' expression, targetome, and functions**

235 Quantitative RT-PCR To detect miRNA, RNA from human skin and wounds was reverse transcribed  
236 using TaqMan® Advanced miRNA cDNA Synthesis Kit (Thermo Fisher Scientific). Individual miRNA  
237 expression was then quantified using TaqMan® Advanced miRNA Assays (Thermo Fisher Scientific)  
238 and normalized with miR-361-5p and miR-423-5p due to their relatively constant expression between  
239 human skin and wounds. To detect mRNA, we performed reverse transcription using the RevertAid  
240 First Strand cDNA Synthesis Kit (ThermoFisher Scientific). Gene expression was examined by SYBR  
241 Green expression assays (ThermoFisher Scientific) and normalized with housekeeping gene B2M and  
242 GAPDH. The primer sequences for B2M are forward primer (5'-AAGTGGGATCGAGACATGTAAG-3')  
243 and reverse primer (5'-GGAGACAGCACTCAAAGTAGAA-3'); GAPDH forward primer (5'-  
244 GGTGTGAACCATGAGAAGTATGA-3') and reverse primer (5'-GAGTCCTTCCACGATACCAAAG-3').

245 Primary cell culture and transfection Adult human epidermal keratinocytes were cultured in EpiLife  
246 serum-free keratinocyte growth medium supplemented with Human Keratinocyte Growth Supplement  
247 (HKGS) and 100 units/mL Penicillin and 100 µg/mL Streptomycin (Thermo Fisher Scientific). Adult  
248 human dermal fibroblasts were cultured in Medium 106 supplemented with Low Serum Growth  
249 Supplement (LSGS) and 100 units/mL Penicillin and 100 µg/mL Streptomycin (Thermo Fisher Scientific).  
250 Cells were incubated at 37°C in 5% CO<sub>2</sub>, and media was routinely changed every 2–3 days. Third  
251 passage keratinocytes at 50%-60% confluence were transfected with 20 nM miRNA mimics (Horizon)  
252 or negative control using Lipofectamine™ 3000 (Thermo Fisher Scientific).

253 Microarray analysis Transcriptome profiling of keratinocytes and fibroblasts transfected with 20 nM  
254 miRNA mimics or control mimics for 24 hours (in triplicates) was performed using Affymetrix Genechip  
255 system at the Microarray Core facility of Karolinska Institute. Normalized expression data (log<sub>2</sub>  
256 transformed value) were exported from Transcriptome Analysis Console (TAC) software and analyzed  
257 by the *limma* R package (Ritchie et al., 2015). In brief, expression data were first fitted to a linear model  
258 for each probe. Then, the empirical Bayes method was applied to compute the estimated coefficients  
259 of gene-wise variability and standard errors for comparisons of experimental and control groups. Genes  
260 with FC > 1.2 and *P*-value < 0.05 between the miRNA mimics- and the control mimics-transfected cells  
261 were considered to be significantly changed. Gene set enrichment analysis, including biological process  
262 (BP), Kyoto Encyclopedia of Genes and Genomes (KEGG) pathway, and hallmark from Molecular  
263 Signatures Database (MSigDB) (<http://www.gsea-msigdb.org/>) (Subramanian et al., 2005), was  
264 performed with a ranked fold change list of all the genes by using the *fgsea* R package (Korotkevich et  
265 al., 2021) and visualized by using the *ggplot2* (Hadley, 2016) and *circlize* (Gu et al., 2014) packages.

266 Immunofluorescence staining Cells transfected with a combination of miRNA and/or control mimics (50  
267 nM in total) were fixed in 4% paraformaldehyde (PFA) for 15 minutes. Cells were incubated with the Ki-  
268 67 antibody (Cell Signaling Technology) overnight at 4°C. The next day, cells were incubated with the  
269 secondary antibody conjugated with Alexa 488 for 40 minutes at room temperature. Cells were mounted  
270 with the ProLong™ Diamond Antifade Mountant with 4',6-Diamidino-2-Phenylindole (DAPI)  
271 (ThermoFisher Scientific). Ki-67 signals were visualized with Nikon microscopy, and positive cells were  
272 counted using ImageJ software (National Institutes of Health).

273 Cell proliferation assay Cells were seeded in 12-well plates with a density of 20,000 cells/well. The  
274 plates were placed in IncuCyte live-cell imaging and analysis platform (Essen Bioscience) after cells

275 attaching to the plates. Plates were imaged every two hours, and pictures were processed and analyzed  
276 using IncuCyte ZOOM 2018A software (Essen Bioscience).

277 Statistical analysis Sample size of each experiment is indicated in the figure legend. Data analysis was  
278 performed by using R and Graphpad Prism 7 software. Comparison between two groups was performed  
279 with Mann-Whitney U tests (unpaired, non-parametric), Wilcoxon signed-rank test (paired, non-  
280 parametric), or two-tailed Student's t-test (parametric). The cell growth assay was analyzed by using  
281 two-way ANOVA. *P*-value < 0.05 is considered to be statistically significant.

282

## 283 **Results**

### 284 **miRNA and mRNA paired expression profiling in human wounds**

285 To better understand tissue repair in humans, we collected wound-edge tissues from human acute  
286 wounds and chronic non-healing VUs (**Figure 1a** and **Table 1–3**). We created 4mm full thickness punch  
287 wounds at the lower legs of healthy volunteers aged beyond 60 years to match the advanced age of  
288 VU patients and anatomical location of the highest VUs occurrence(Vivas et al., 2016). Tissue was  
289 collected at baseline (Skin), and at day one and day seven post-wounding (Wound1 and Wound7) to  
290 capture the inflammatory and proliferative phases of wound healing, respectively. In total, 20 samples  
291 divided into four groups, i.e., Skin, Wound1, Wound7, and VU, were analyzed by Illumina small RNA  
292 sequencing (sRNA-seq) and ribosomal RNA-depleted long RNA sequencing (RNA-seq). After stringent  
293 raw sequencing data quality control (**Table S1** and **S2**), we detected 562 mature miRs and  
294 12,069 mRNAs in our samples. Our principal component analysis showed that either the miR or the  
295 mRNA expression profiles clearly separated these four sample groups (**Figure 1b**). Next, we performed  
296 pairwise comparisons to identify the differentially expressed genes (DEG) during wound repair. We  
297 compared the VUs with both the skin and acute wounds and unraveled a VU-specific gene signature,  
298 including aberrant increase of 22 miRs and 221 mRNAs and decrease of 10 miRs and 203 mRNAs (DE  
299 analysis FDR < 0.05, fold change  $\geq 2$  for miRs and  $\geq 1.5$  for mRNAs, **Figure 1c–e** and **Additional file**  
300 **1**). The full DEG list can be browsed on our resource website  
301 (<https://www.xulandenlab.com/humanwounds-mirna-mrna>) with more or less rigorous cut-offs. With this  
302 unique resource, we dissected further the miR-mediated posttranscriptional regulatory underpinnings  
303 of wound repair.

304

### 305 **Dynamically changed miR expression during wound repair**

306 We leveraged weighted gene co-expression network analysis (WGCNA) for classifying miRs according  
307 to their co-expression patterns in the 20 sRNA-seq-analyzed samples to link the miR expression  
308 changes with wound healing progression or non-healing status at a system level(Langfelder & Horvath,  
309 2008). We identified 13 distinct modules with a robustness confirmed by the module preservation  
310 analysis (**Figure 2 - figure supplement 1a**), ten of them significantly correlating (Pearson's correlation,  
311 FDR < 0.05) with at least one of the four phenotypic traits, i.e., Skin, Wound1, Wound7, and VU

312 **(Fig. 2a and b, Additional file 2)**. The WGCNA revealed that module (m)2, m10, and m11 miRs were  
313 upregulated at the inflammatory phase (Wound1), while m5 and m6 miRs peaked at the proliferative  
314 phase (Wound7). In VU, we identified three downregulated (m3, m7, and m9) and two upregulated (m8  
315 and m12) miR modules. We highlighted the 198 “driver” miRs (i.e, the top 20 miRNAs with the highest  
316 kME values in each module and  $kME > 0.5$ ) of the ten significant modules in the co-expression networks  
317 **(Figure. 2c, d and Figure 2 - figure supplement 2b–i)** and they could also be browsed on our resource  
318 web portal (<https://www.xulandenlab.com/humanwounds-mirna-mrna>). Notably, we identified 84% of  
319 them as DEGs, suggesting a high consistence between the WGCNA and DE analysis **(Additional file**  
320 **3)**.

321  
322 We hypothesized that the co-expression of various miRs could be due to their transcription driven by  
323 common transcription factors (TF). To test this idea, we leveraged TransmiR v2.0(Tong et al., 2019), a  
324 database including literature-curated and ChIP-seq-derived TF-miR regulation data, to identify the  
325 enriched TFs in each miR module [Fisher’s exact test: odds ratio (OR)  $> 1$ ,  $FDR < 0.05$ , **Additional**  
326 **file 4**]. Interestingly, the BMP4, KLF4, KLF5, GATA3, GRHL2, and TP53 families exhibited not only  
327 their binding sites enriched in the m9 miR genes but their expression also significantly correlated with  
328 the m9 miRs (Pearson’s correlation coefficient = 0.53–0.82,  $P$ -value of  $p = 7.05e-06$ –0.014) **(Figure 2d,**  
329 **Figure 2 - figure supplement 3a and Additional file 4)**. Notably, the BMP4, GATA3, and KLF4  
330 expressions were significantly reduced in VU compared to the skin and acute wounds. This result could  
331 explain the deficiency of their regulated miRs in VU and also suggest a link between these TFs and  
332 chronic wound pathology **(Figure 2 - figure supplement 3b)**.

333  
334 **mRNA co-expression networks underpinning wound repair**

335 miRs exert functions through the posttranscriptional regulation of their target mRNAs. Therefore,  
336 describing the mRNA expression context would be required for understanding the role of miRs in wound  
337 repair(Agarwal et al., 2015). We thus performed WGCNA in the paired long RNA-seq data and identified  
338 13 mRNA co-expression modules **(Figure. 2e, Figure 2 - figure supplement 1b, Figure 2 - figure**  
339 **supplement 4a–c, and Additional file 5)**. The GO analysis of the mRNA modules largely confirmed  
340 the previous knowledge of wound biology, such as skin hemostasis (M2) and barrier function (M4)-  
341 related gene downregulation in the wounds, the upregulation of the genes involved in the immune

342 response (M8), RNA processing, and protein production (M1, M3, and M5) in the inflammatory phase,  
343 and the prominent cell mitosis-related gene expression (M7) in the proliferative phase of wound repair  
344 (**Figure 2f** and **Figure 2 - figure supplement 5a**). These results further supported the robustness and  
345 reproducibility of our profiling data. Moreover, this unique dataset allows the identification of the key  
346 TFs driving these biological processes. For example, we identified NFKB1 and RELA, well-known for  
347 their immune functions(Liu et al., 2017), as the most enriched upstream regulators for the M1 mRNAs,  
348 while E2F1, a TF promoting cell growth(Ertosun et al., 2016), surfaced as a master regulator TF in M7  
349 (**Additional file 6**).

350  
351 Importantly, our study unraveled a VU molecular signature: downregulated expression of RNA and  
352 protein production- (M1, M3, and M5) as well as cell mitosis-related (M7) genes, and upregulated  
353 expression of genes involved in extracellular matrix organization and cell adhesion (M9). These results  
354 were in line with the dermal tissue fibrosis observed in patients with chronic venous  
355 insufficiency(Blumberg et al., 2012; Pappas et al., 1999; Stone et al., 2020). Moreover, we found an  
356 immune gene signature clearly distinguishing the chronic inflammation in VUs (M11 and M12 enriched  
357 with adaptive immunity-related mRNAs) from the self-limiting immune response in acute wounds (M8  
358 enriched with neutrophil activation- and phagocytosis-related mRNAs) (**Figure 2f** and **Figure 2 - figure  
359 supplement 5b**). Overall, we generated a gene expression map of human healing and non-healing  
360 wounds, setting a stepping stone for the in-depth understanding of the VU pathological mechanisms.  
361 After having established this map, we decided to dissect how miRs contribute to these pathological  
362 changes.

### 363 364 **Integrative analysis of miR and mRNA expression changes in wound healing**

365 Among the multiple gene expression regulatory mechanisms, we aimed to evaluate how miRs could  
366 contribute to the protein-coding gene expression in human wound repair. We thus performed a  
367 correlation analysis for the miRs and mRNAs that were differentially expressed in VU compared to the  
368 skin and acute wounds, using the first principal component (PC1) of their expression in each sample.  
369 We found significantly negative correlations (Pearson's correlation, P-values: 1.36e-12–1.27e-04)  
370 between the PC1 of the DE miRs and the DE mRNAs predicted as miR targets, indicating negative  
371 regulation of VU-mRNA signature by the aberrantly expressed miRs in VU (**Figure 3a–c**).

372 Furthermore, we dissected the potential regulatory relationship between the VU-associated miR and  
373 mRNA modules. We identified significantly negative correlations between the downregulated miR (m3,  
374 m7, and m9) and the upregulated mRNA (M9, M11, and M12) modules, as well as between the  
375 upregulated miR (m8 and m12) and the downregulated mRNA (M5) modules in VU (**Figure 3d**). Among  
376 these miR-mRNA module pairs, we found that the predicted targets of the downregulated m9 miRs  
377 were significantly enriched (Fisher's exact test:  $OR > 1$ ,  $P$ -value  $< 0.05$ ) for the upregulated M9  
378 mRNAs, whereas the targets of the upregulated miRs and m8 miRs were enriched for the  
379 downregulated mRNAs and M5 mRNAs (**Figure 4a** and **Additional file 7**). These results demonstrated  
380 that miRs significantly contribute to the aberrant mRNA expression in VU at a global level.

381 Based on the above-identified miR-mRNA module pairs, we next searched for individual candidate miRs  
382 with their targets enriched for the VU mRNA signature. We observed that the targets of two VU-  
383 associated downregulated miRs (miR-144-3p and miR-218-5p) and five m9 miRs (miR-205-5p, miR-  
384 211-5p, miR-506-3p, miR-509-3p, and miR-96-5p) were enriched for the upregulated M9 mRNAs,  
385 whereas the targets of three VU-associated upregulated miRs (miR-450-5p, miR-512-3p, and miR-  
386 516b-5p) and seven m8 miRs (miR-424-5p, miR-34a-5p, miR-34c-5p, miR-516a-5p, miR-517a-3p, miR-  
387 517b-3p, and miR-7704) were enriched for M5 mRNAs and downregulated mRNAs (**Figure 4b** and  
388 **Additional file 8**). These miR targetomes were enriched for the mRNAs associated with VU pathology.  
389 Therefore, these miR candidates are of importance for understanding the pathological mechanisms  
390 hindering wound healing. Moreover, we compiled miR-mediated gene expression regulation networks  
391 centered with these highly pathologically relevant miRs (**Figure 4c**, **Figure 4 – figure supplement 1**,  
392 **2** and **Additional file 8**). These networks also include the mRNAs predicted as the strongest targets  
393 and with anti-correlated expression patterns with these miRs in human wounds *in vivo*, as well as the  
394 TFs reported to regulate these miR expressions from the TransmiR v2 database (Tong et al., 2019).  
395 Taken together, our study identifies a list of highly pathological relevant miRs and their targetomes in  
396 human VU.

397

### 398 **Experimental validation of miR expressions and targets in human skin wounds**

399 We selected nine shortlisted DE miRs (**Figure 1d** and **4b**), including three downregulated (miR-149-5p,  
400 miR-218-5p, and miR-96-5p) and six upregulated (miR-7704, miR-424-5p, miR-31-3p, miR-450-5p,  
401 miR-516b-5p, and miR-517b-3p) miRs in VU, and validated their expression by qRT-PCR in a cohort

402 with seven healthy donors and twelve VU patients, matched in terms of age and the anatomical wound  
403 locations (**Table 2** and **3**). We confirmed their expression patterns in RNA-seq, supporting the  
404 robustness and reproducibility of our profiling data (**Figure 5a–i**, **Figure 5 – figure supplement 1** and  
405 **Additional file 9**).

406 Furthermore, we experimentally validated the targets of eight miRs surfaced in our analysis (**Figure 4b**),  
407 including the miRs downregulated (miR-218-5p and miR-96-5p) and upregulated (miR-424-5p, miR-  
408 450-5p, miR-516b-5p, miR-34a-5p, miR-34c-5p, and miR-7704) in VU. We performed genome-wide  
409 microarray analysis in human primary keratinocytes or fibroblasts overexpressing each of these miRs.  
410 Furthermore, we re-analyzed our published microarray dataset on keratinocytes with miR-34a-5p or  
411 miR-34c-5p overexpression (GSE117506)(Pachera et al., 2020). For all these eight miRs, we observed  
412 that their strongest targets predicted by TargetScan were significantly downregulated compared to the  
413 non-targeting mRNAs (Wilcoxon t-test P-values:  $1.34e-25$ – $1.91e-59$ ). The differences were more  
414 significant when we divided the strongest targets into conserved and experimentally validated subtypes,  
415 confirming the bioinformatics prediction robustness of the miR targets applied in this study (**Figure 5j–**  
416 **m** and **Figure 5 – figure supplement 2a - j**).

417 Notably, we observed significant enrichment (Fisher's exact test,  $OR > 1$ ,  $P$ -value  $< 0.05$ ) of the  
418 experimentally validated miR-218-5p, miR-34a-5p, miR-34c-5p, and miR-7704 targets for the VU gene  
419 signature (**Figure 5n** and **Additional file 9**). We have previously shown that miR-34a and miR-34c  
420 inhibit keratinocyte proliferation and migration, while promoting apoptosis and inflammatory response,  
421 resulting in delayed wound repair in a mouse model(Pachera et al., 2020). We validated robustness of  
422 the bioinformatics approach applied in this study by miR-34a/c re-identification. Here, we discovered  
423 that both the predicted (**Figure 4b**) and validated (**Figure 5n**) miR-34a/c targets were enriched for the  
424 downregulated M5 module mRNAs in VU. Notably, our microarray analysis confirmed that miR-34a/c  
425 reduced the expression of 39 hub genes in the M5 module [ $\log_2(\text{fold change}) \leq -0.58$ ,  $P$ -value  $< 0.05$ ,  
426 Fig. S9j], and 26 of them exhibited negative correlation (Pearson's  $r = -0.83$  –  $-0.45$ ,  $P$ -value  $< 0.05$ )  
427 with miR-34a/c expression levels in the human skin and wound samples (**Figure 5o** and **Additional**  
428 **file 9**), suggesting that they were miR-34a/c targets *in vivo*. MiR-218-5p was downregulated in the VU  
429 compared to the acute wounds and the skin (**Figure 5b** and **Figure 5 – figure supplement 1**). Its  
430 predicted (**Figure 4b**) and validated (**Figure 5n**) targets were both enriched for the upregulated or M9  
431 module mRNAs in VU. Among the ten *in vitro* validated targets, eight negatively correlated (Pearson's



432  $r = -0.82 \sim -0.46$ ,  $P$ -value of  $p < 0.05$ ) with miR-218-5p expression in the human skin and wounds  
433 (**Figure 5o**, **Figure 5 – figure supplement 2j**, and **Additional file 9**). Interestingly, this study also  
434 identified miR-7704, a human-specific miR, with significantly increased expression in VU (**Figure 5d**  
435 and **Figure 5 – figure supplement 1**). Similar to miR-34a/c, the predicted (**Figure 4b**) and validated  
436 (**Figure 5n**) miR-7704 targets were highly enriched for the M5 module mRNAs downregulated in VU.  
437 For miR-96-5p, miR-424-5p, miR-450-5p, and miR-516b-5p, although their predicted targets were  
438 significantly enriched (Fisher's exact test:  $OR > 1$ ,  $P$ -value  $< 0.05$ ) for VU-associated mRNAs  
439 (**Figure 4b**), we did not find similar enrichment for their experimentally validated targets. Nevertheless,  
440 these miRs regulated some VU-associated hub genes *in vitro* (**Figure 5 – figure supplement 2k**) and  
441 also exhibited an anti-correlated expression pattern with their targets *in vivo* (**Figure 5p**), e.g., miR-96-  
442 5p from the downregulated m9 module targets the M9 mRNAs upregulated in VU, including TP53INP1,  
443 LAMC1, EDNRA, GJC1, and FN1; while miR-424-5p from the upregulated m8 miR module targets the  
444 M5 mRNAs downregulated in VU, including SLC25A22, VPS4A, and GHR (**Additional file 9**).  
445 In summary, we experimentally validated the expression and targets of the miRs identified by the RNA-  
446 seq data bioinformatics analysis, confirming the robustness and reproducibility of this dataset and  
447 highlighting its value as a reference for studying the physiological and pathological roles of miRs in  
448 human skin wound healing.

449

#### 450 **Cooperativity of VU pathology-relevant miRs**

451 From the miR-mediated gene expression regulation networks underpinning VU pathology (**Figure 4 –**  
452 **figure supplement 1, 2**, and **Additional file 8**), we caught a glimpse of presumable miR cooperativity  
453 through targeting the same mRNAs, i.e., co-targeting among miRs, which reportedly imposing stronger  
454 and more complex repression patterns on target mRNA expression (Cherone et al., 2019). For the miRs  
455 with unrelated seed sequences, we found that miR-34a/c and miR-424-5p or miR-7704 shared eight–  
456 ten targets, and these miRs were co-expressed in the m8 module. We showed that among the  
457 downregulated miRs in VU, miR-96-5p and miR-218-5p shared eight targets.

458 In addition, we performed functional annotations for the genes regulated by the VU-associated miRs  
459 identified in the microarray analysis (**Figure 6a** and **Additional file 10**). Both miR-218-5p and miR-96-  
460 5p promoted ribosome biogenesis and non-coding (nc) RNA processing, while miR-218-5p also

461 suppressed keratinization. miR-34a/c-5p enhanced innate immune response, while reducing mitosis.  
462 Similarly, miR-424-5p and miR-516b-5p increased the cellular defense response, while inhibiting cell  
463 proliferation. In addition, we showed that miR-450-5p upregulated genes related to the ncRNA  
464 metabolic process and mitochondrial respiratory chain complex assembly, whereas miR-7704  
465 downregulated insulin, ERBB, and small GTPase-mediated signaling pathway-related genes. Of  
466 particular interest, combining the miR expression changes with their annotated functions, we found a  
467 regular pattern, i.e., the miRs upregulated in VU (i.e., miR-34a-5p, miR-34c-5p, miR-424-5p, miR-450-  
468 5p, miR-7704, and miR-516-5p) promoted inflammation but inhibited proliferation; whereas the miRs  
469 downregulated in VU (i.e., miR-218-5p and miR-96-5p) were required for cell growth and activation  
470 (**Figure 6b**). Therefore, these VU-dysregulated miRs might cooperatively contribute to the stalled  
471 wound healing characterized with failed transition from inflammation-to-proliferation(Landen et al.,  
472 2016).

473

#### 474 **Cooperation of miR-34a, miR-424, and miR-516 in regulating keratinocyte proliferation and** 475 **inflammatory response**

476 To validate miR cooperativity in modulating the key pathological processes in VU, we analyzed  
477 proliferation and inflammatory response of keratinocytes overexpressing individual miR or miR  
478 combinations. The microarray data gene ontology analysis (**Figure 6b**) showed that three miRs  
479 upregulated in VU could suppress the expression of mitotic spindle-related genes (**Figure 6c**): miR-  
480 34a/c-5p reduced the level of 41 mRNAs (including two miR-34a/c targets), while miR-424-5p  
481 downregulated the expression of 67 mRNAs (including 14 miR-424 targets). Although 33 mRNAs were  
482 commonly regulated by miR-34a/c-5p and miR-424-5p, none of them were co-targeted by these miRs  
483 (**Figure 6c**). Similarly, in the cell cycle pathway, miR-34a-5p directly targeted CCND1, CDK6, HDAC1,  
484 and E2F3, while miR-424-5p targeted ANAPC13, CCNE1, CDC25B, CDK1, CDKN1B, CHK1, WEE1,  
485 and YWHAH, and only CDC23 was co-targeted by both miRs (**Figure 7a**). We thus hypothesized that  
486 miR-34a-5p and miR-424-5p might cooperate to impact stronger on cell proliferation by targeting  
487 different gene sets within the same signaling pathway. To test this idea, we measured keratinocyte  
488 growth by detecting proliferation marker gene Ki67 expression both on mRNA and protein levels. We  
489 found that although miR-34a-5p or miR-424-5p alone could reduce Ki67 levels, their combination  
490 suppressed stronger Ki67 expression (**Figure 7b–c, Figure 7 – supplement 1a and additional file**

491 **11)**. The cooperativity between miR-34a-5p and miR-424-5p in repressing keratinocyte growth was  
492 further confirmed by comparing cell growth curves generated with a live cell imaging system (**Figure 7d**,  
493 **Figure 7 – supplement 1b** and **Video 1**). Moreover, our microarray analysis showed that the miR-34a-  
494 5p and miR-516b-5p combination extended the list of inflammatory response-related upregulated genes  
495 (**Figure 6d**). In line with this, simultaneously overexpressing miR-34a-5p and miR-516b-5p induced a  
496 higher inflammatory chemokine CCL20 expression compared to the individual overexpression of each  
497 miRNA (**Figure 7e**). In summary, our study identified VU signature miRs, e.g., miR-34a, miR-424, and  
498 miR-516, with cooperativity in inflicting more severe pathological changes (**Figure 7f**). These findings  
499 open new opportunities of developing wound treatment targeting cooperating miRs with potentially  
500 higher therapeutic efficacy and specificity.

## 501 **Discussion**

502 Our genome-wide paired analysis of miR and mRNA expression in human healing and non-healing  
503 wounds provides a novel global landscape of the miR regulatory roles in wound biology. A detailed  
504 overview of the mRNA expression context at different healing stages or under pathological condition  
505 VU allows a more precise understanding about the complex role of miRs in wound repair. The same  
506 miR is often described to play different or even opposite roles in different cells, as each cell type has  
507 specific gene expression context subjected to the miR-mediated posttranscriptional regulation(Erhard  
508 et al., 2014). Thereby, the different mRNA expression profiles in acute or chronic wounds should be  
509 considered to understand the precise role of an miR in these distinct contexts. With this aspect in mind,  
510 we highlight miRs with their targetome most enriched in the VU mRNA signature, as these miRs display  
511 a higher likelihood to regulate pathologically relevant genes. Notably, certain of these miRs did not  
512 exhibit the greatest expression change in VU, they would thus be missed with the commonly used  
513 strategy that focuses on the top miR expression profiling data changes.

514 Another strength of our study is the decryption of time-resolved miR-mRNA expression pattern during  
515 human skin wound healing, providing a temporal view to our understanding of the functional miR roles.  
516 miRs and their target gene expression contexts change dynamically to support different functional  
517 needs during wound repair. Defining an miR as “pro-healing” or “anti-healing” requires specifying its  
518 temporal expression pattern. For example, continuous expression of a miR that is beneficial for one  
519 healing phase but not the other might also lead to deleterious effects.

520 To understand the molecular mechanisms underlying the miR co-expression patterns, we analyzed the  
521 enriched TFs for each miR module with experimentally validated TF-miR regulation data(Tong et al.,  
522 2019). This analysis led us to important TFs, such as BMP4(Botchkarev, 2003; Lewis et al., 2014) and  
523 GATA3(Kaufman et al., 2003; Kurek et al., 2007) that play fundamental roles in skin development and  
524 postnatal remodeling, as well as KLF4, crucial for establishing skin barrier function(Segre et al., 1999).  
525 Notably, both GATA3 and KLF4 are reportedly downregulated in human VU(Stojadinovic et al., 2014;  
526 Stojadinovic et al., 2008). Our study confirms these findings and provides a novel insight, showing that  
527 the loss of these TFs might contribute to VU pathology through their regulated miRs.

528 Numerous miRs that reportedly regulate wound healing in animal models also surfaced in our study,  
529 supporting the robustness of our profiling data and bioinformatics analysis. Thereby, our data would be

530 potentially helpful to evaluate the clinical relevance of these miRs. For example, miR-34a/c reportedly  
531 enhance keratinocyte inflammatory response, while suppressing proliferation and migration in cultured  
532 cells and mouse wound models(Wu et al., 2020). miR-34a was also identified as one of the most  
533 induced miRs in diabetic foot ulcer fibroblasts. Induction of miR-34a together with miR-21-5p and miR-  
534 145-5p inhibits fibroblast movement and proliferation, whereas activates cell differentiation and  
535 senescence(Liang et al., 2016). In this study, we described that miR-34a/c were specifically upregulated  
536 in VU, whereas their levels during wound repair remained relatively low and stable, suggesting their  
537 specific role in wound pathology. miR-34 targets were enriched in the M5 mRNA module, containing  
538 genes upregulated in the inflammatory phase of wound healing but downregulated in VUs. The VU-  
539 relevant miR-34 targetome identified in this study would be potentially useful for determining the precise  
540 role of miR-34 in VU pathology. Our current findings in human samples together with previous functional  
541 data(Liang et al., 2016; Wu et al., 2020) suggest that miR-34 inhibition along with modulation of  
542 additional deregulated miRs might be a promising VU treatment approach.

543 In addition, certain of these VU-related miRs are involved in skin-related functions but have not yet been  
544 linked to wound healing. For example, miR-218-5p regulates hair follicle development(Zhao et al., 2019),  
545 inhibits melanogenesis(J. Guo et al., 2014), and enhances fibroblast differentiation(F. Guo et al., 2014).  
546 miR-7704 was identified as an exosomal miR produced by melanocytes(Shen et al., 2020). miR-424-  
547 5p suppresses keratinocyte proliferation(Ichihara et al., 2011) and cutaneous angiogenesis(Nakashima  
548 et al., 2010; Yang et al., 2017). Moreover, our VU-related miR list (**Figure 4b**) also contains miRs  
549 without prior knowledge in their role either in skin or wound healing, e.g., miR-517a-3p, miR-517b-3p,  
550 miR-516b-5p, miR-512-3p, and miR-450-5p. It would be highly interesting to examine the role of these  
551 miRs in VU. Overall, our dataset can serve as a valuable reference for prioritizing clinically relevant  
552 miRs for further functional studies.

553 Moreover, we studied the relationships between the dysregulated miRs in VU, regarding their target  
554 repertoire and biological functions and identified miRs that could act cooperatively. Such knowledge is  
555 required for developing combined miR therapeutics with increased specificity and efficacy(Lai et al.,  
556 2019). In the miR-target networks underpinning VU (**Figure 4 – figure supplement 1 and 2**), we  
557 identified a few putative cooperating miR pairs/clusters that were co-expressed and shared multiple  
558 common targets, including the upregulated miR-34a/c together with miR-424-5p and miR-7704, as well  
559 as the downregulated miR-218-5p and miR-96-5p in VU. Furthermore, although not sharing targets, the

560 majority of the VU-dysregulated miRs could still regulate the common biological processes coordinately.  
561 For example, the miRs upregulated in VU (e.g., miR-34a/c-5p, miR-424-5p, miR-450-5p, miR-7704,  
562 and miR-516-5p) promote inflammation but inhibit proliferation; whereas the miRs downregulated in VU  
563 (e.g., miR-218-5p and miR-96-5p) are needed for cell growth and activation. As a combined  
564 consequence, this VU-miR signature could disrupt the swift transition from inflammation to proliferation  
565 (**Figure 7f**). The failure of this phase transition represents a core pathology of chronic wounds(Eming  
566 et al., 2014; Landen et al., 2016). Our findings open the possibility of developing innovative wound  
567 treatment targeting multiple pathologically relevant cooperating miRs to attain higher therapeutic  
568 efficacy and specificity.

569 Based on the integrative small and long RNA-omics analysis of human wound tissues, we have  
570 developed an openly available compendium (<https://www.xulandenlab.com/humanwounds-mirna-mrna>)  
571 for the research community. This novel, rich resource enabled us to gain a network view of miR-  
572 mediated gene regulation during human physiological and pathological wound repair in vivo. With the  
573 same sequencing datasets, we have also analyzed circular RNA expression and their potential  
574 interaction with miRs and miR targets(Toma et al., 2021), which results can be queried at  
575 <https://www.xulandenlab.com/humanwounds-circrna>. These efforts result in many testable hypotheses  
576 for future studies elucidating gene expression regulatory mechanisms underpinning tissue repair.

577 A limitation of our study is the lack of cell type specific miR expression data. Certain gene expression  
578 changes detected in the tissue biopsies might be due to the changes of cellular compositions. To rule  
579 out this possibility, we validated miR-mediated gene regulation in individual skin cell types (i.e.,  
580 keratinocytes and fibroblasts) for several miRs surfaced in our analysis. However, to systemically  
581 differentiate the gene expression regulation occurring in an individual cell from the altered cellular  
582 composition in wound tissues requires future studies using single-cell small RNA sequencing, which  
583 technology still remains challenging to be used at a scale for analyzing complex dynamics of tissue,  
584 such as human skin and wounds, as it needs extensive cell handling and therefore has only been applied  
585 to few cells(Nielsen & Pedersen, 2020). As new technologies for higher cellular resolution miRNA  
586 analyses emerge, we hope that such approach will be feasible in a near future.

587

588 **Conclusion**

589 In conclusion, this genome-wide, integrative analysis of miR and mRNA expression in human skin and  
590 wound tissues reinforce and extend the evidence about the functional role of miRs in wound repair and  
591 their therapeutic potential for chronic wound treatment. By combining miR expression patterns with their  
592 specific target gene expression context, we identified miRs highly relevant to VU pathology. This  
593 rigorous and in-depth molecular characterization of human wound tissues adds a novel dimension to  
594 our current knowledge mostly relying on non-human models and would serve as a unique platform and  
595 valuable resource for further mechanistic studies of miRs with a high translational potential.

596 **Data availability**

597 Raw data of small RNA sequencing, long RNA sequencing and microarray performed in this study have  
598 been deposited to NCBI's Gene Expression Omnibus (GEO) database under the accession number  
599 GSE174661 (Reviewer access with a token 'cvmpqccylxgnzgj') and GSE196773, respectively. In  
600 addition, the analyzed dataset is presented with an online R Shiny app and can be accessed through a  
601 browsable web portal (<https://www.xulandenlab.com/humanwounds-mirna-mrna>). The analysis source  
602 code is available at <https://github.com/Zhuang-Bio/miRNAprofiling>.

603

604 **Competing Interest Statement**

605 The authors declare no conflict of interest.

606

607 **Funding and Acknowledgements**

608 We express our gratitude to the patients and healthy donors participating in this study. We thank Mona  
609 Ståhle, Desiree Wiegleb Edström, Peter Berg, Fredrik Correa, Martin Gumulka, Mahsa Tayefi for clinical  
610 sample collection; Helena Griehsel for technical support. We thank the Microarray core facility at Novum,  
611 BEA, which is supported by the board of research at KI and the research committee at the Karolinska  
612 hospital. The computations/data handling was enabled by resources in the projects sens2020010 and  
613 2021/22-701 provided by the Swedish National Infrastructure for Computing (SNIC) at UPPMAX,  
614 partially funded by the Swedish Research Council through grant agreement no. 2018-05973. This work  
615 was supported by Swedish Research Council (Vetenskapsradet, 2016-02051 and 2020-01400), Ragnar  
616 Söderbergs Foundation (M31/15), Welander and Finsens Foundation (Hudfonden), LEO foundation,  
617 Ming Wai Lau Centre for Reparative Medicine, Karolinska Institutet, and R01AR073614 from  
618 NIH/NIAMS (to MTC).

619

620 **Author Contributions**

621 N.X.L. and P.S. conceived and designed the study. P.S. collected most clinical samples with the  
622 assistance of M.A.T.. L.Z., D.L., M.A.T., and X.B. performed the experiments. Z.L. and L.Z. carried out  
623 bioinformatics analysis. I.P. and M.T.C contributed to data analyses and interpretation. Z.L., L.Z., and  
624 N.X.L. wrote the manuscript, which was commented on by all authors.



625 **References**

- 626 Agarwal, V., Bell, G. W., Nam, J. W., & Bartel, D. P. (2015, Aug 12). Predicting effective microRNA target  
627 sites in mammalian mRNAs. *Elife*, 4. <https://doi.org/10.7554/eLife.05005>
- 628  
629 Blumberg, S. N., Maggi, J., Melamed, J., Golinko, M., Ross, F., & Chen, W. (2012, Dec). A histopathologic  
630 basis for surgical debridement to promote healing of venous ulcers. *J Am Coll Surg*, 215(6), 751-757.  
631 <https://doi.org/10.1016/j.jamcollsurg.2012.08.008>
- 632  
633 Bolger, A. M., Lohse, M., & Usadel, B. (2014, Aug 1). Trimmomatic: a flexible trimmer for Illumina sequence  
634 data. *Bioinformatics*, 30(15), 2114-2120. <https://doi.org/10.1093/bioinformatics/btu170>
- 635  
636 Botchkarev, V. A. (2003, 2003/01/01/). Bone Morphogenetic Proteins and Their Antagonists in Skin and Hair  
637 Follicle Biology. *Journal of Investigative Dermatology*, 120(1), 36-47.  
638 <https://doi.org/https://doi.org/10.1046/j.1523-1747.2003.12002.x>
- 639  
640 Cherone, J. M., Jorgji, V., & Burge, C. B. (2019). Cotargeting among microRNAs in the brain. *Genome*  
641 *research*, 29(11), 1791-1804. <https://doi.org/10.1101/gr.249201.119>
- 642  
643 Darwin, E., & Tomic-Canic, M. (2018, Dec). Healing Chronic Wounds: Current Challenges and Potential  
644 Solutions. *Curr Dermatol Rep*, 7(4), 296-302. <https://doi.org/10.1007/s13671-018-0239-4>
- 645  
646 Dobin, A., Davis, C. A., Schlesinger, F., Drenkow, J., Zaleski, C., Jha, S., Batut, P., Chaisson, M., & Gingeras,  
647 T. R. (2013, Jan 1). STAR: ultrafast universal RNA-seq aligner. *Bioinformatics*, 29(1), 15-21.  
648 <https://doi.org/10.1093/bioinformatics/bts635>
- 649  
650 Elliot, S., Wikramanayake, T. C., Jozic, I., & Tomic-Canic, M. (2018, Apr). A Modeling Conundrum: Murine  
651 Models for Cutaneous Wound Healing. *J Invest Dermatol*, 138(4), 736-740.  
652 <https://doi.org/10.1016/j.jid.2017.12.001>
- 653  
654 Eming, S. A., Martin, P., & Tomic-Canic, M. (2014, Dec 3). Wound repair and regeneration: mechanisms,  
655 signaling, and translation. *Sci Transl Med*, 6(265), 265sr266.  
656 <https://doi.org/10.1126/scitranslmed.3009337>
- 657  
658 Erhard, F., Haas, J., Lieber, D., Malterer, G., Jaskiewicz, L., Zavolan, M., Dölken, L., & Zimmer, R. (2014).  
659 Widespread context dependency of microRNA-mediated regulation. *Genome research*, 24(6), 906-919.  
660 <https://doi.org/10.1101/gr.166702.113>
- 661  
662 Ertosun, M. G., Hapil, F. Z., & Osman Nidai, O. (2016, 2016/10/01/). E2F1 transcription factor and its impact  
663 on growth factor and cytokine signaling. *Cytokine & Growth Factor Reviews*, 31, 17-25.  
664 <https://doi.org/https://doi.org/10.1016/j.cytogfr.2016.02.001>
- 665  
666 Friedlander, M. R., Mackowiak, S. D., Li, N., Chen, W., & Rajewsky, N. (2012, Jan). miRDeep2 accurately  
667 identifies known and hundreds of novel microRNA genes in seven animal clades. *Nucleic Acids Res*,  
668 40(1), 37-52. <https://doi.org/10.1093/nar/gkr688>
- 669  
670 Gu, Z., Eils, R., & Schlesner, M. (2016, Sep 15). Complex heatmaps reveal patterns and correlations in  
671 multidimensional genomic data. *Bioinformatics*, 32(18), 2847-2849.  
672 <https://doi.org/10.1093/bioinformatics/btw313>

- 673  
674 Gu, Z., Gu, L., Eils, R., Schlesner, M., & Brors, B. (2014, Oct). circlize Implements and enhances circular  
675 visualization in R. *Bioinformatics*, 30(19), 2811-2812. <https://doi.org/10.1093/bioinformatics/btu393>  
676
- 677  
678 Guo, F., Carter, D. E., & Leask, A. (2014, Apr). miR-218 regulates focal adhesion kinase-dependent TGFβ  
679 signaling in fibroblasts. *Mol Biol Cell*, 25(7), 1151-1158. <https://doi.org/10.1091/mbc.E13-08-0451>  
680
- 681  
682 Guo, J., Zhang, J. F., Wang, W. M., Cheung, F. W., Lu, Y. F., Ng, C. F., Kung, H. F., & Liu, W. K. (2014).  
683 MicroRNA-218 inhibits melanogenesis by directly suppressing microphthalmia-associated  
684 transcription factor expression. *RNA Biol*, 11(6), 732-741. <https://doi.org/10.4161/rna.28865>
- 685  
686 Hadley, W. (2016). ggplot2: Elegant Graphics for Data Analysis. *Springer-Verlag New York*.  
687 <https://ggplot2.tidyverse.org>
- 688  
689 Han, H., Cho, J. W., Lee, S., Yun, A., Kim, H., Bae, D., Yang, S., Kim, C. Y., Lee, M., Kim, E., Lee, S., Kang,  
690 B., Jeong, D., Kim, Y., Jeon, H. N., Jung, H., Nam, S., Chung, M., Kim, J. H., & Lee, I. (2018, Jan 4).  
691 TRRUST v2: an expanded reference database of human and mouse transcriptional regulatory  
692 interactions. *Nucleic Acids Res*, 46(D1), D380-d386. <https://doi.org/10.1093/nar/gkx1013>
- 693  
694 Herter, E. K., & Xu Landen, N. (2017, Mar 1). Non-Coding RNAs: New Players in Skin Wound Healing. *Adv*  
695 *Wound Care (New Rochelle)*, 6(3), 93-107. <https://doi.org/10.1089/wound.2016.0711>
- 696  
697 Hoversten, K. P., Kiemele, L. J., Stolp, A. M., Takahashi, P. Y., & Verdoorn, B. P. (2020, Sep). Prevention,  
698 Diagnosis, and Management of Chronic Wounds in Older Adults. *Mayo Clin Proc*, 95(9), 2021-2034.  
699 <https://doi.org/10.1016/j.mayocp.2019.10.014>
- 700  
701 Ichihara, A., Jinnin, M., Yamane, K., Fujisawa, A., Sakai, K., Masuguchi, S., Fukushima, S., Maruo, K., & Ihn,  
702 H. (2011, Nov). microRNA-mediated keratinocyte hyperproliferation in psoriasis vulgaris. *Br J*  
703 *Dermatol*, 165(5), 1003-1010. <https://doi.org/10.1111/j.1365-2133.2011.10497.x>
- 704  
705 Kaufman, C. K., Zhou, P., Pasolli, H. A., Rendl, M., Bolotin, D., Lim, K. C., Dai, X., Alegre, M. L., & Fuchs,  
706 E. (2003, Sep 1). GATA-3: an unexpected regulator of cell lineage determination in skin. *Genes Dev*,  
707 17(17), 2108-2122. <https://doi.org/10.1101/gad.1115203>
- 708  
709 Korotkevich, G., Sukhov, V., Budin, N., Shpak, B., Artyomov, M. N., & Sergushichev, A. (2021). Fast gene set  
710 enrichment analysis. *bioRxiv*, 060012. <https://doi.org/10.1101/060012>
- 711  
712 Kozomara, A., Birgaoanu, M., & Griffiths-Jones, S. (2018). miRBase: from microRNA sequences to function.  
713 *Nucleic Acids Research*, 47(D1), D155-D162. <https://doi.org/10.1093/nar/gky1141>
- 714  
715 Kurek, D., Garinis, G. A., van Doorninck, J. H., van der Wees, J., & Grosveld, F. G. (2007, Jan). Transcriptome  
716 and phenotypic analysis reveals Gata3-dependent signalling pathways in murine hair follicles.  
717 *Development*, 134(2), 261-272. <https://doi.org/10.1242/dev.02721>
- 718  
719 Lai, X., Eberhardt, M., Schmitz, U., & Vera, J. (2019). Systems biology-based investigation of cooperating  
720 microRNAs as monotherapy or adjuvant therapy in cancer. *Nucleic Acids Research*, 47(15), 7753-  
721 7766. <https://doi.org/10.1093/nar/gkz638>

- 722  
723 Landen, N. X., Li, D., & Stahle, M. (2016, Oct). Transition from inflammation to proliferation: a critical step  
724 during wound healing. *Cell Mol Life Sci*, 73(20), 3861-3885. [https://doi.org/10.1007/s00018-016-2268-](https://doi.org/10.1007/s00018-016-2268-0)  
725 [0](https://doi.org/10.1007/s00018-016-2268-0)
- 726  
727 Langfelder, P., & Horvath, S. (2008, Dec 29). WGCNA: an R package for weighted correlation network  
728 analysis. *BMC Bioinformatics*, 9, 559. <https://doi.org/10.1186/1471-2105-9-559>
- 729  
730 Langfelder, P., Luo, R., Oldham, M. C., & Horvath, S. (2011, Jan 20). Is my network module preserved and  
731 reproducible? *PLoS Comput Biol*, 7(1), e1001057. <https://doi.org/10.1371/journal.pcbi.1001057>
- 732  
733 Langmead, B., Trapnell, C., Pop, M., & Salzberg, S. L. (2009, 2009/03/04). Ultrafast and memory-efficient  
734 alignment of short DNA sequences to the human genome. *Genome Biology*, 10(3), R25.  
735 <https://doi.org/10.1186/gb-2009-10-3-r25>
- 736  
737 Lewis, B. P., Burge, C. B., & Bartel, D. P. (2005, 2005/01/14/). Conserved Seed Pairing, Often Flanked by  
738 Adenosines, Indicates that Thousands of Human Genes are MicroRNA Targets. *Cell*, 120(1), 15-20.  
739 <https://doi.org/https://doi.org/10.1016/j.cell.2004.12.035>
- 740  
741 Lewis, C. J., Mardaryev, A. N., Poterlowicz, K., Sharova, T. Y., Aziz, A., Sharpe, D. T., Botchkareva, N. V., &  
742 Sharov, A. A. (2014, Mar). Bone morphogenetic protein signaling suppresses wound-induced skin  
743 repair by inhibiting keratinocyte proliferation and migration. *J Invest Dermatol*, 134(3), 827-837.  
744 <https://doi.org/10.1038/jid.2013.419>
- 745  
746 Li, D., Wang, A., Liu, X., Meisgen, F., Grunler, J., Botusan, I. R., Narayanan, S., Erikci, E., Li, X., Blomqvist,  
747 L., Du, L., Pivarsci, A., Sonkoly, E., Chowdhury, K., Catrina, S. B., Stahle, M., & Landen, N. X.  
748 (2015, Aug 3). MicroRNA-132 enhances transition from inflammation to proliferation during wound  
749 healing. *J Clin Invest*, 125(8), 3008-3026. <https://doi.org/10.1172/JCI79052>
- 750  
751 Liang, L., Stone, R. C., Stojadinovic, O., Ramirez, H., Pastar, I., Maione, A. G., Smith, A., Yanez, V., Veves,  
752 A., Kirsner, R. S., Garlick, J. A., & Tomic-Canic, M. (2016, Nov). Integrative analysis of miRNA and  
753 mRNA paired expression profiling of primary fibroblast derived from diabetic foot ulcers reveals  
754 multiple impaired cellular functions. *Wound Repair Regen*, 24(6), 943-953.  
755 <https://doi.org/10.1111/wrr.12470>
- 756  
757 Liang, P., Lv, C., Jiang, B., Long, X., Zhang, P., Zhang, M., Xie, T., & Huang, X. (2012, 2012/06/01/).  
758 MicroRNA profiling in denatured dermis of deep burn patients. *Burns*, 38(4), 534-540.  
759 <https://doi.org/https://doi.org/10.1016/j.burns.2011.10.014>
- 760  
761 Liao, Y., Smyth, G. K., & Shi, W. (2013). featureCounts: an efficient general purpose program for assigning  
762 sequence reads to genomic features. *Bioinformatics*, 30(7), 923-930.  
763 <https://doi.org/10.1093/bioinformatics/btt656>
- 764  
765 Liao, Y., Wang, J., Jaehnig, E. J., Shi, Z., & Zhang, B. (2019). WebGestalt 2019: gene set analysis toolkit with  
766 revamped UIs and APIs. *Nucleic Acids Research*, 47(W1), W199-W205.  
767 <https://doi.org/10.1093/nar/gkz401>
- 768  
769 Liu, T., Zhang, L., Joo, D., & Sun, S.-C. (2017, 2017/07/14). NF- $\kappa$ B signaling in inflammation. *Signal*  
770 *Transduction and Targeted Therapy*, 2(1), 17023. <https://doi.org/10.1038/sigtrans.2017.23>
- 771

- 772 Love, M. I., Huber, W., & Anders, S. (2014, 2014/12/05). Moderated estimation of fold change and dispersion  
773 for RNA-seq data with DESeq2. *Genome Biology*, 15(12), 550. [https://doi.org/10.1186/s13059-014-](https://doi.org/10.1186/s13059-014-0550-8)  
774 [0550-8](https://doi.org/10.1186/s13059-014-0550-8)
- 775  
776 Luan, A., Hu, M. S., Leavitt, T., Brett, E. A., Wang, K. C., Longaker, M. T., & Wan, D. C. (2018, Jan 1).  
777 Noncoding RNAs in Wound Healing: A New and Vast Frontier. *Adv Wound Care (New Rochelle)*,  
778 7(1), 19-27. <https://doi.org/10.1089/wound.2017.0765>
- 779  
780 Mackowiak, S. D. (2011, Dec). Identification of novel and known miRNAs in deep-sequencing data with  
781 miRDeep2. *Curr Protoc Bioinformatics*, Chapter 12, Unit 12 10.  
782 <https://doi.org/10.1002/0471250953.bi1210s36>
- 783  
784 Meng, Z., Zhou, D., Gao, Y., Zeng, M., & Wang, W. (2018, Apr). miRNA delivery for skin wound healing. *Adv*  
785 *Drug Deliv Rev*, 129, 308-318. <https://doi.org/10.1016/j.addr.2017.12.011>
- 786  
787 Nakashima, T., Jinnin, M., Etoh, T., Fukushima, S., Masuguchi, S., Maruo, K., Inoue, Y., Ishihara, T., & Ihn, H.  
788 (2010, Dec 14). Down-regulation of mir-424 contributes to the abnormal angiogenesis via MEK1 and  
789 cyclin E1 in senile hemangioma: its implications to therapy. *PLoS One*, 5(12), e14334.  
790 <https://doi.org/10.1371/journal.pone.0014334>
- 791  
792 Nie, X., Zhao, J., Ling, H., Deng, Y., Li, X., & He, Y. (2020, Sep). Exploring microRNAs in diabetic chronic  
793 cutaneous ulcers: Regulatory mechanisms and therapeutic potential. *Br J Pharmacol*, 177(18), 4077-  
794 4095. <https://doi.org/10.1111/bph.15139>
- 795  
796 Nielsen, M. M., & Pedersen, J. S. (2020). miRNA activity inferred from single cell mRNA expression. *bioRxiv*,  
797 2020.2007.2014.202051. <https://doi.org/10.1101/2020.07.14.202051>
- 798  
799 Pachera, E., Assassi, S., Salazar, G. A., Stellato, M., Renoux, F., Wunderlin, A., Blyszczuk, P., Lafyatis, R.,  
800 Kurreeman, F., de Vries-Bouwstra, J., Messemaker, T., Feghali-Bostwick, C. A., Rogler, G., van  
801 Haaften, W. T., Dijkstra, G., Oakley, F., Calcagni, M., Schniering, J., Maurer, B., Distler, J. H., Kania,  
802 G., Frank-Bertoncelj, M., & Distler, O. (2020, Sep 1). Long noncoding RNA H19X is a key mediator  
803 of TGF-beta-driven fibrosis. *J Clin Invest*, 130(9), 4888-4905. <https://doi.org/10.1172/JCI135439>
- 804  
805 Pappas, P. J., You, R., Rameshwar, P., Gorti, R., DeFouw, D. O., Phillips, C. K., Padberg, F. T., Jr., Silva, M.  
806 B., Jr., Simonian, G. T., Hobson, R. W., 2nd, & Duran, W. N. (1999, Dec). Dermal tissue fibrosis in  
807 patients with chronic venous insufficiency is associated with increased transforming growth factor-  
808 beta1 gene expression and protein production. *J Vasc Surg*, 30(6), 1129-1145.  
809 [https://doi.org/10.1016/s0741-5214\(99\)70054-6](https://doi.org/10.1016/s0741-5214(99)70054-6)
- 810  
811 Pastar, I., Marjanovic, J., Stone, R. C., Chen, V., Burgess, J. L., Mervis, J. S., & Tomic-Canic, M. (2021, Mar  
812 10). Epigenetic regulation of cellular functions in wound healing. *Exp Dermatol*.  
813 <https://doi.org/10.1111/exd.14325>
- 814  
815 Pastar, I., Wong, L. L., Egger, A. N., & Tomic-Canic, M. (2018, May). Descriptive vs mechanistic scientific  
816 approach to study wound healing and its inhibition: Is there a value of translational research involving  
817 human subjects? *Exp Dermatol*, 27(5), 551-562. <https://doi.org/10.1111/exd.13663>
- 818  
819 Ramirez, H. A., Pastar, I., Jozic, I., Stojadinovic, O., Stone, R. C., Ojeh, N., Gil, J., Davis, S. C., Kirsner, R. S.,  
820 & Tomic-Canic, M. (2018, May). Staphylococcus aureus Triggers Induction of miR-15B-5P to

- 821 Diminish DNA Repair and Deregulate Inflammatory Response in Diabetic Foot Ulcers. *J Invest*  
822 *Dermatol*, 138(5), 1187-1196. <https://doi.org/10.1016/j.jid.2017.11.038>
- 823  
824 Reinke, J. M., & Sorg, H. (2012). Wound repair and regeneration. *Eur Surg Res*, 49(1), 35-43.  
825 <https://doi.org/10.1159/000339613>
- 826  
827 Ritchie, M. E., Phipson, B., Wu, D., Hu, Y., Law, C. W., Shi, W., & Smyth, G. K. (2015). limma powers  
828 differential expression analyses for RNA-sequencing and microarray studies. *Nucleic Acids Research*,  
829 43(7), e47-e47. <https://doi.org/10.1093/nar/gkv007>
- 830  
831 Ru, Y., Kechris, K. J., Tabakoff, B., Hoffman, P., Radcliffe, R. A., Bowler, R., Mahaffey, S., Rossi, S., Calin,  
832 G. A., Bemis, L., & Theodorescu, D. (2014). The multiMiR R package and database: integration of  
833 microRNA–target interactions along with their disease and drug associations. *Nucleic Acids Research*,  
834 42(17), e133-e133. <https://doi.org/10.1093/nar/gku631>
- 835  
836 Rupaimoole, R., & Slack, F. J. (2017, Mar). MicroRNA therapeutics: towards a new era for the management of  
837 cancer and other diseases. *Nat Rev Drug Discov*, 16(3), 203-222. <https://doi.org/10.1038/nrd.2016.246>  
838
- 839  
840 Segre, J. A., Bauer, C., & Fuchs, E. (1999, 1999/08/01). Klf4 is a transcription factor required for establishing  
841 the barrier function of the skin. *Nature Genetics*, 22(4), 356-360. <https://doi.org/10.1038/11926>
- 842  
843 Sen, C. K., & Roy, S. (2012, Dec). OxymiRs in cutaneous development, wound repair and regeneration. *Semin*  
844 *Cell Dev Biol*, 23(9), 971-980. <https://doi.org/10.1016/j.semcdb.2012.09.012>
- 845  
846 Shannon, P., Markiel, A., Ozier, O., Baliga, N. S., Wang, J. T., Ramage, D., Amin, N., Schwikowski, B., &  
847 Ideker, T. (2003, Nov). Cytoscape: a software environment for integrated models of biomolecular  
848 interaction networks. *Genome Res*, 13(11), 2498-2504. <https://doi.org/10.1101/gr.1239303>
- 849  
850 Shen, Z., Sun, J., Shao, J., & Xu, J. (2020). Ultraviolet B irradiation enhances the secretion of exosomes by  
851 human primary melanocytes and changes their exosomal miRNA profile. *PLoS One*, 15(8), e0237023.  
852 <https://doi.org/10.1371/journal.pone.0237023>
- 853  
854 Stavast, C. J., & Erkeland, S. J. (2019). The Non-Canonical Aspects of MicroRNAs: Many Roads to Gene  
855 Regulation. *Cells*, 8(11), 1465. <https://doi.org/10.3390/cells8111465>
- 856  
857 Stojadinovic, O., Pastar, I., Nusbaum, A. G., Vukelic, S., Krzyzanowska, A., & Tomic-Canic, M. (2014, Mar-  
858 Apr). Deregulation of epidermal stem cell niche contributes to pathogenesis of nonhealing venous  
859 ulcers. *Wound Repair Regen*, 22(2), 220-227. <https://doi.org/10.1111/wrr.12142>
- 860  
861 Stojadinovic, O., Pastar, I., Vukelic, S., Mahoney, M. G., Brennan, D., Krzyzanowska, A., Golinko, M., Brem,  
862 H., & Tomic-Canic, M. (2008, Dec). Deregulation of keratinocyte differentiation and activation: a  
863 hallmark of venous ulcers. *J Cell Mol Med*, 12(6b), 2675-2690. [https://doi.org/10.1111/j.1582-](https://doi.org/10.1111/j.1582-4934.2008.00321.x)  
864 [4934.2008.00321.x](https://doi.org/10.1111/j.1582-4934.2008.00321.x)
- 865  
866 Stone, R. C., Stojadinovic, O., Rosa, A. M., Ramirez, H. A., Badiavas, E., Blumenberg, M., & Tomic-Canic, M.  
867 (2017, Jan 4). A bioengineered living cell construct activates an acute wound healing response in  
868 venous leg ulcers. *Sci Transl Med*, 9(371). <https://doi.org/10.1126/scitranslmed.aaf8611>
- 869

- 870 Stone, R. C., Stojadinovic, O., Sawaya, A. P., Glinos, G. D., Lindley, L. E., Pastar, I., Badiavas, E., & Tomic-  
871 Canic, M. (2020, Mar). A bioengineered living cell construct activates metallothionein/zinc/MMP8 and  
872 inhibits TGF $\beta$  to stimulate remodeling of fibrotic venous leg ulcers. *Wound Repair Regen*, 28(2), 164-  
873 176. <https://doi.org/10.1111/wrr.12778>
- 874  
875 Subramanian, A., Tamayo, P., Mootha, V. K., Mukherjee, S., Ebert, B. L., Gillette, M. A., Paulovich, A.,  
876 Pomeroy, S. L., Golub, T. R., Lander, E. S., & Mesirov, J. P. (2005, Oct 25). Gene set enrichment  
877 analysis: a knowledge-based approach for interpreting genome-wide expression profiles. *Proc Natl*  
878 *Acad Sci U S A*, 102(43), 15545-15550. <https://doi.org/10.1073/pnas.0506580102>
- 879  
880 [Record #219 is using a reference type undefined in this output style.]
- 881  
882 Tong, Z., Cui, Q., Wang, J., & Zhou, Y. (2019, Jan 8). TransmiR v2.0: an updated transcription factor-  
883 microRNA regulation database. *Nucleic Acids Res*, 47(D1), D253-d258.  
884 <https://doi.org/10.1093/nar/gky1023>
- 885  
886 Vivas, A., Lev-Tov, H., & Kirsner, R. S. (2016, Aug 2). Venous Leg Ulcers. *Ann Intern Med*, 165(3), Itc17-  
887 itc32. <https://doi.org/10.7326/aitec201608020>
- 888  
889 Wu, J., Li, X., Li, D., Ren, X., Li, Y., Herter, E. K., Qian, M., Toma, M. A., Wintler, A. M., Serezal, I. G.,  
890 Rollman, O., Stahle, M., Wikstrom, J. D., Ye, X., & Landen, N. X. (2020, Feb). MicroRNA-34 Family  
891 Enhances Wound Inflammation by Targeting LGR4. *J Invest Dermatol*, 140(2), 465-476 e411.  
892 <https://doi.org/10.1016/j.jid.2019.07.694>
- 893  
894 Wu, Y. E., Parikshak, N. N., Belgard, T. G., & Geschwind, D. H. (2016, Nov). Genome-wide, integrative  
895 analysis implicates microRNA dysregulation in autism spectrum disorder. *Nat Neurosci*, 19(11), 1463-  
896 1476. <https://doi.org/10.1038/nn.4373>
- 897  
898 Yang, L., Dai, J., Li, F., Cheng, H., Yan, D., & Ruan, Q. (2017, Sep 19). The expression and function of miR-  
899 424 in infantile skin hemangioma and its mechanism. *Sci Rep*, 7(1), 11846.  
900 <https://doi.org/10.1038/s41598-017-10674-7>
- 901  
902 Zhang, B., & Horvath, S. (2005). A general framework for weighted gene co-expression network analysis. *Stat*  
903 *Appl Genet Mol Biol*, 4, Article17. <https://doi.org/10.2202/1544-6115.1128>
- 904  
905 Zhao, B., Chen, Y., Yang, N., Chen, Q., Bao, Z., Liu, M., Hu, S., Li, J., & Wu, X. (2019, Nov). miR-218-5p  
906 regulates skin and hair follicle development through Wnt/ $\beta$ -catenin signaling pathway by targeting  
907 SFRP2. *J Cell Physiol*, 234(11), 20329-20341. <https://doi.org/10.1002/jcp.28633>
- 908  
909 Zhou, L., Chen, J., Li, Z., Li, X., Hu, X., Huang, Y., Zhao, X., Liang, C., Wang, Y., Sun, L., Shi, M., Xu, X.,  
910 Shen, F., Chen, M., Han, Z., Peng, Z., Zhai, Q., Chen, J., Zhang, Z., Yang, R., Ye, J., Guan, Z., Yang,  
911 H., Gui, Y., Wang, J., Cai, Z., & Zhang, X. (2010, Dec 30). Integrated profiling of microRNAs and  
912 mRNAs: microRNAs located on Xq27.3 associate with clear cell renal cell carcinoma. *PLoS One*,  
913 5(12), e15224. <https://doi.org/10.1371/journal.pone.0015224>
- 914  
915

916 **Figures with legends**

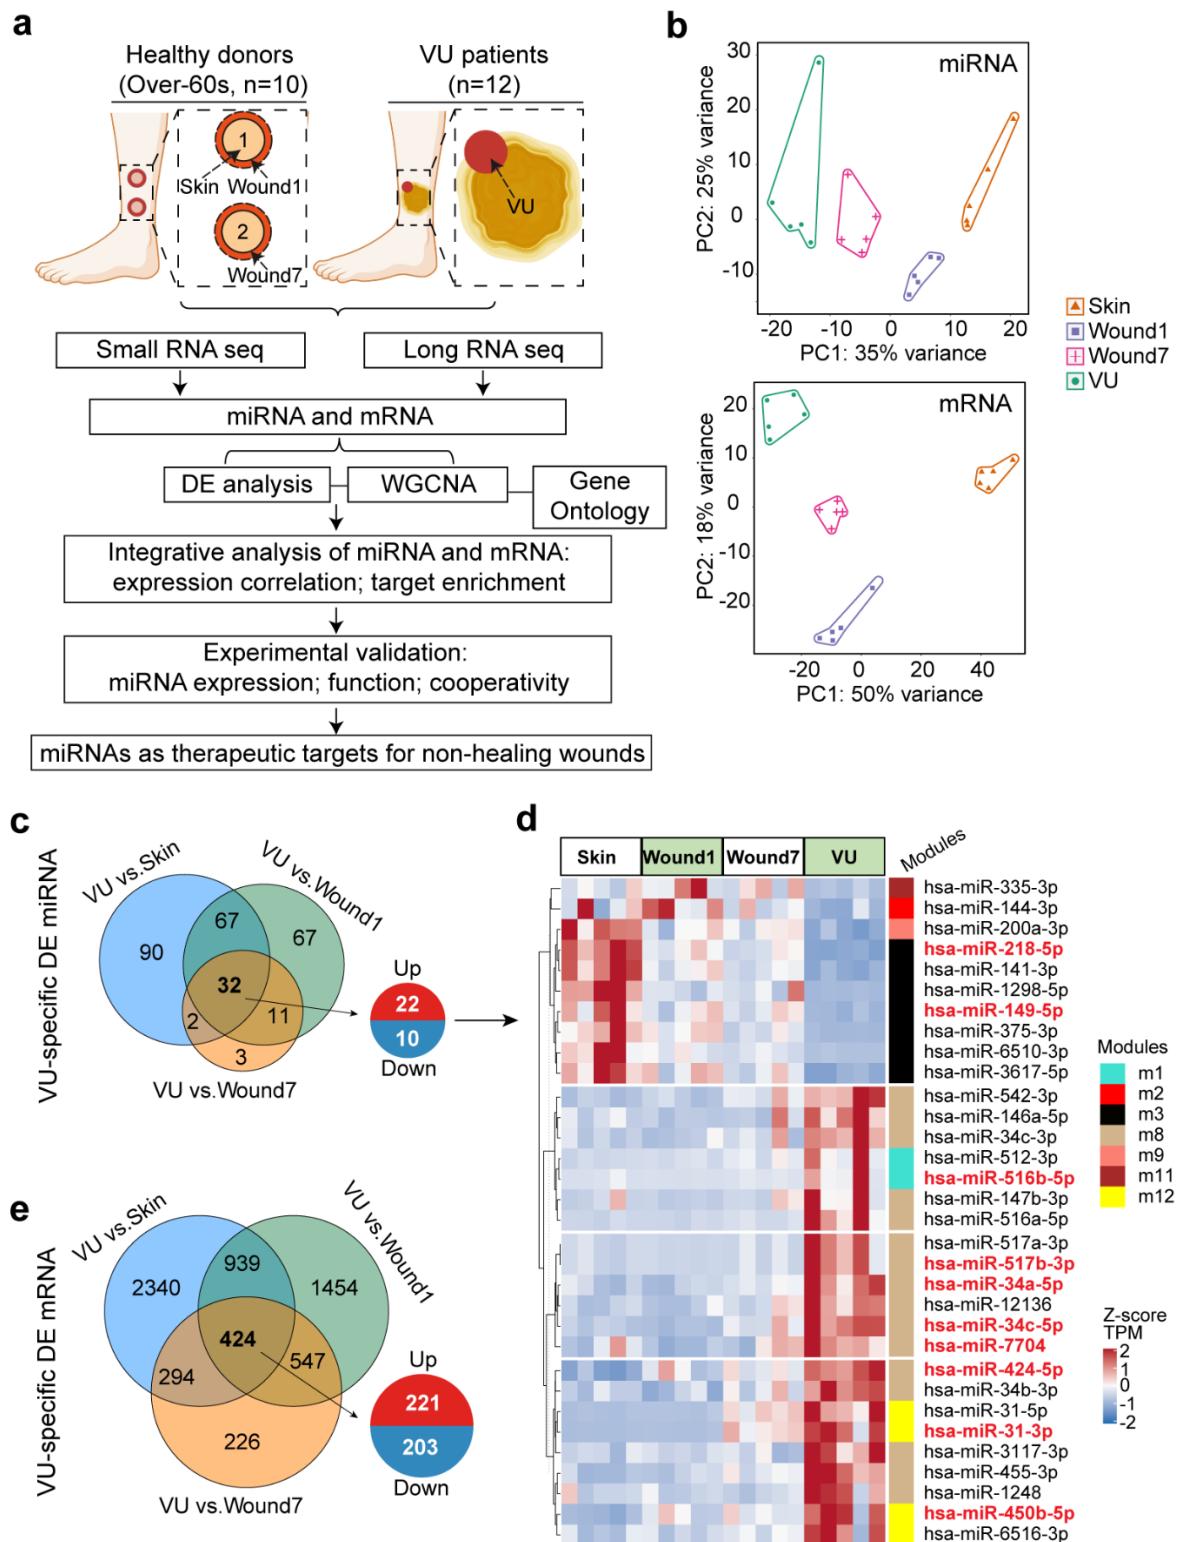

917

918 **Figure 1 Paired profiling of miRNA and mRNA expression in human wounds.** a Schematic of

919 analysis in this study. b PCA plots based on miRNA (upper panel) and mRNA (lower panel) expression

920 profiles. Each dot indicates an individual sample. The numbers of differentially expressed (DE) miRNAs

921 **c** and mRNAs **e** in VU (n=5) compared to the Skin, Wound1, and Wound7 from 5 healthy donors are  
922 shown in Venn diagrams. FDR < 0.05, fold change  $\geq 2$  for miRNAs and  $\geq 1.5$  for mRNAs. **d** The heatmap  
923 depicts the 32 miRNAs specifically dysregulated in the VU with scaled expression values (Z-scores).  
924 WGCNA modules of each miRNA belongs to are marked with color bars. The miRNAs with  
925 experimentally validated expression changes are highlighted in red.



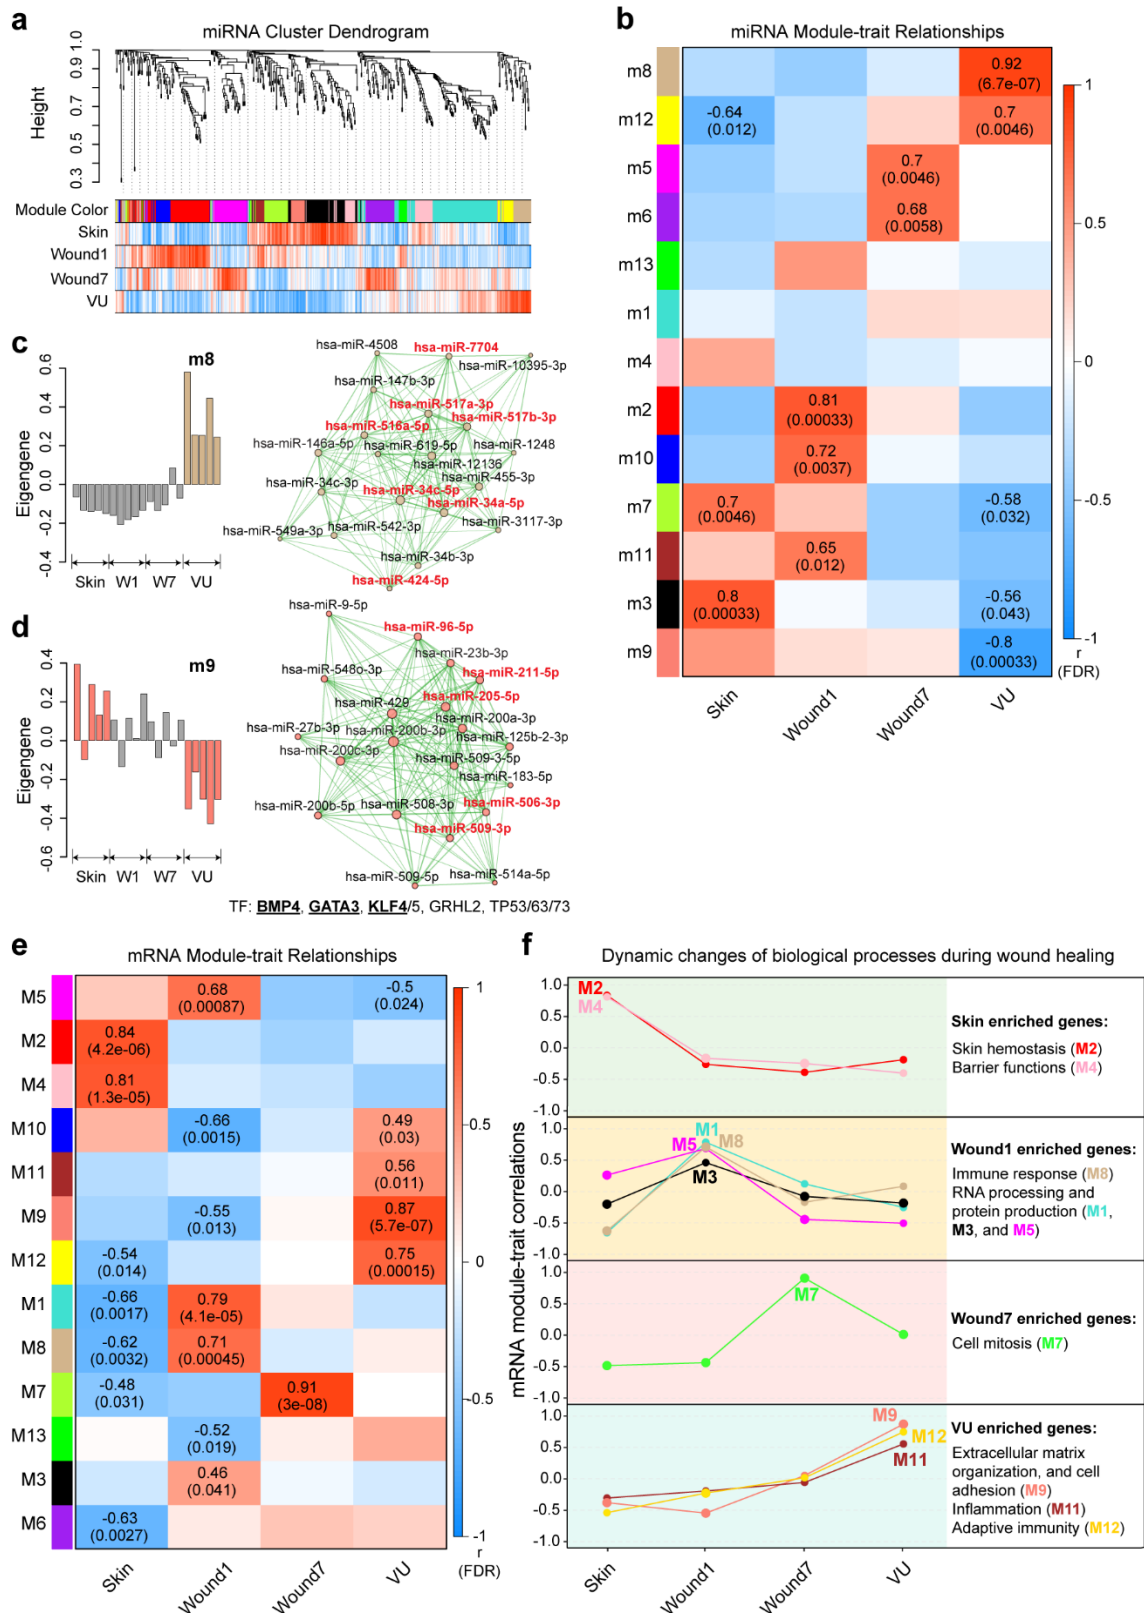

926

927 **Figure 2 Weighted gene co-expression network analysis (WGCNA) of miRNAs and mRNAs in**

928 **wound healing.** a Cluster dendrogram shows miRNA co-expression modules: each branch

929 corresponds to a module, and each leaf indicates a single miRNA. Color bars below show the module

930 assignment (the 1<sup>st</sup> row) and Pearson correlation coefficients between miRNA expression and the  
931 sample groups (the 2<sup>nd</sup> to the 5<sup>th</sup> row: red and blue lines represent positive and negative correlations,  
932 respectively). **b** Heatmap shows Pearson correlations between miRNA module eigengenes (ME) and  
933 the sample groups. The correlation coefficients and the adjusted *P-values* (FDR) are shown where the  
934 FDRs are less than 0.05. For the VU-associated modules m8 **c** and m9 **d**, bar plots (left) depict the ME  
935 values across the 20 samples analyzed by RNA-seq, and network plots (right) show the top 20 miRNAs  
936 with the highest kME values in each module. Node size and edge thickness are proportional to the kME  
937 values and the weighted correlations between two connected miRNAs, respectively. The miRs with their  
938 targetome enriched with VU-mRNA signature (see **Figure 4b**) are highlighted in red. Transcription  
939 factors (TFs) with their targets enriched in the m9 module (Fisher's exact test: FDR < 0.05) are listed  
940 below the network, and TFs differentially expressed in VU are underlined. **e** Heatmap shows Pearson  
941 correlations between mRNA MEs and the sample groups. **f** The gene expression pattern of each  
942 module across all the sample groups is depicted with line charts. Gene ontology analysis of biological  
943 processes enriched in each module is shown at the right.

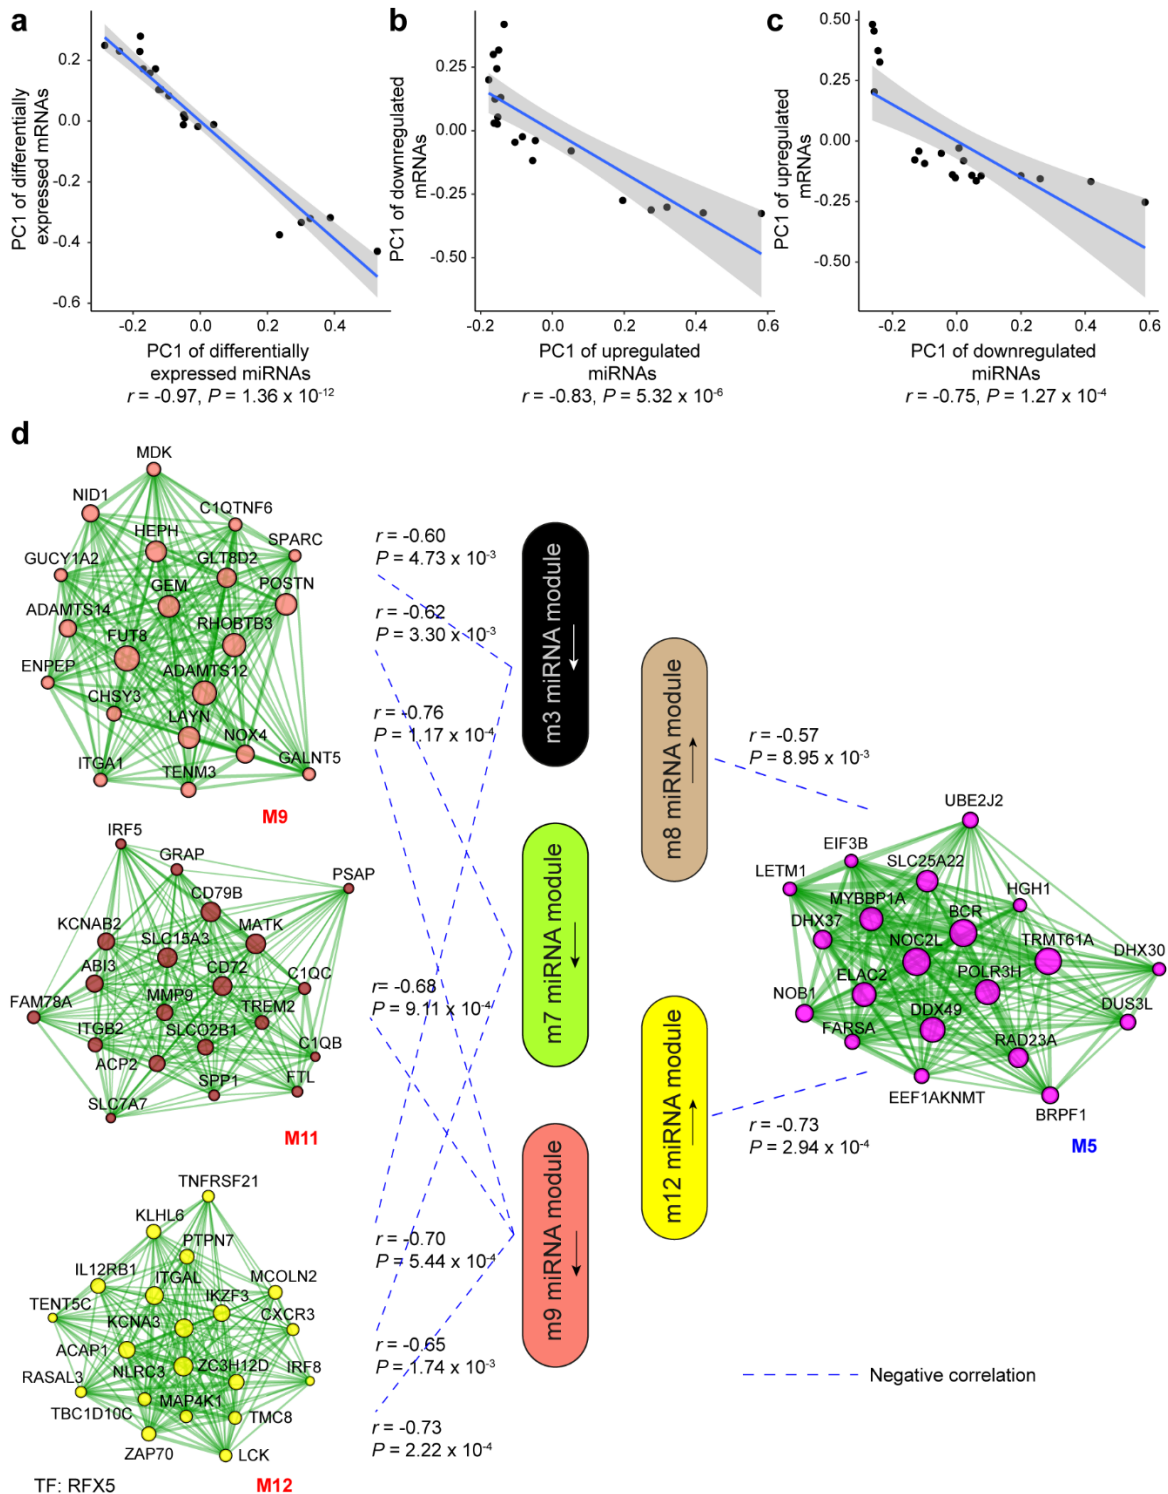

944

945 **Figure 3 Correlation analysis between miRNA and mRNA expression changes in VU. a-c**

946 Correlations between the first principal component (PC1) of VU-associated differentially expressed (DE)

947 miRNAs, and the PC1 of VU DE mRNAs predicted as miRNA targets. **d** PC1 correlations between the

948 hub miRNAs and their predicted targets in the VU-associated miRNA and mRNA modules. Pearson

949 correlation coefficients ( $r$ ) and  $P$  values are shown. The mRNA networks are plotted with the top 20  
950 most connected module genes. Transcription factors (TFs) with targets enriched in the VU-associated  
951 modules are listed below the networks.

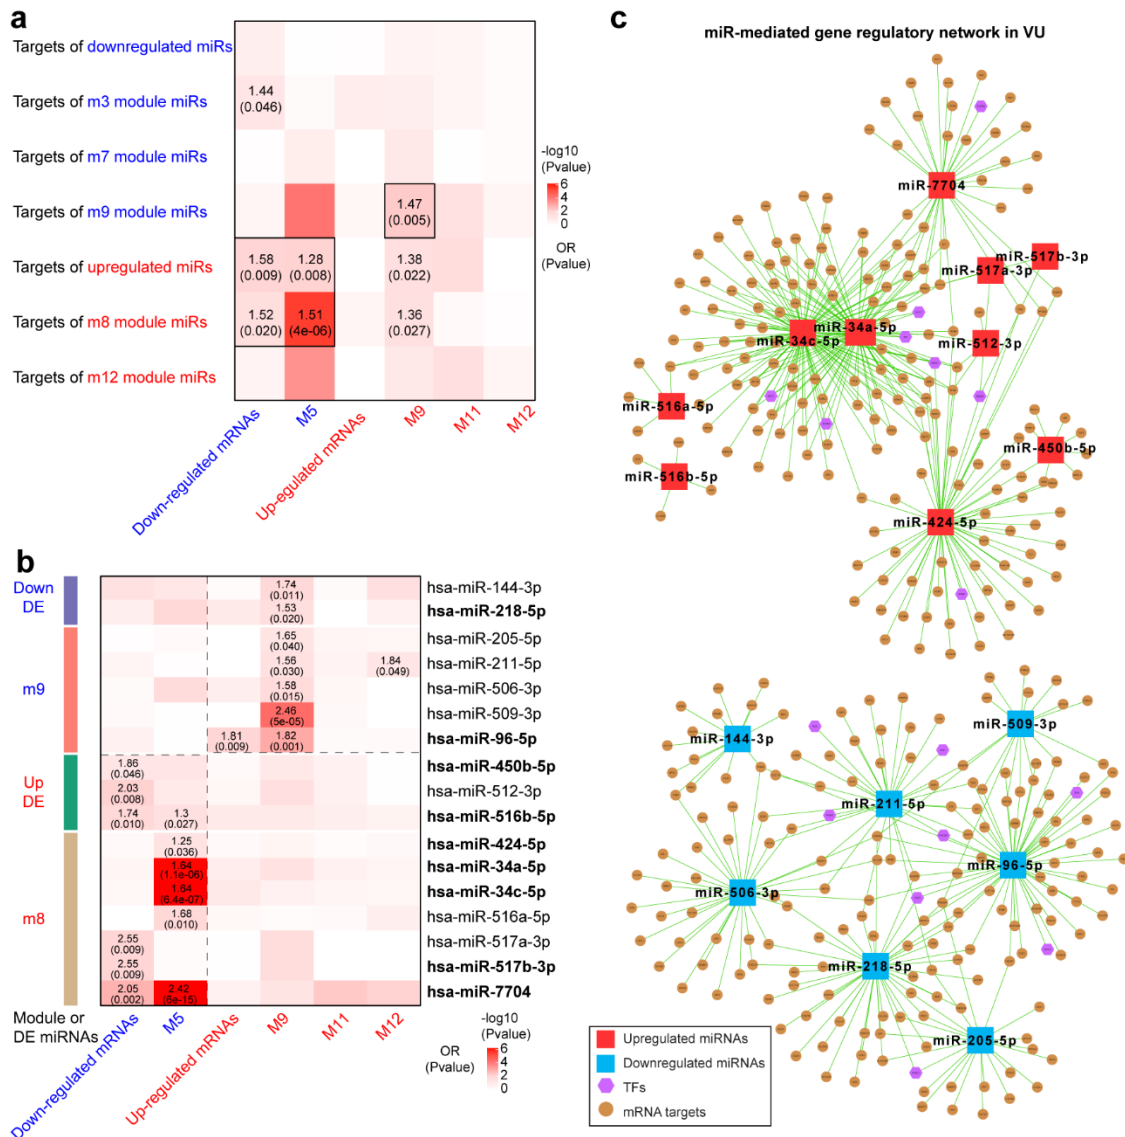

952

953 **Figure 4 Integrative analysis of miRNA and mRNA expression changes in VU.** Heatmaps show

954 the enrichment for VU-affected mRNAs and mRNA modules in the top targets of a VU-associated DE

955 miRNAs and miR modules and b the individual candidate miRNAs. Odds ratio (OR) and P values are

956 indicated when OR > 1 and P-value < 0.05 (Fisher's exact test). The miRNAs with experimentally

957 validated expression changes are highlighted in bold. c miR-mediated gene regulatory networks in VU

958 are constructed with the miRNAs in Figure 4b, the mRNAs predicted as the strongest targets and with

959 anti-correlated expression patterns (Pearson correlation, P-value < 0.05 and r < 0) with these miRNAs

960 in human wounds, and the TFs regulating these miRNAs' expression from the TransmiR v2 database.

961 An enlarged version of these networks can be found in Figure 4 – figure supplement 1 and 2.

962

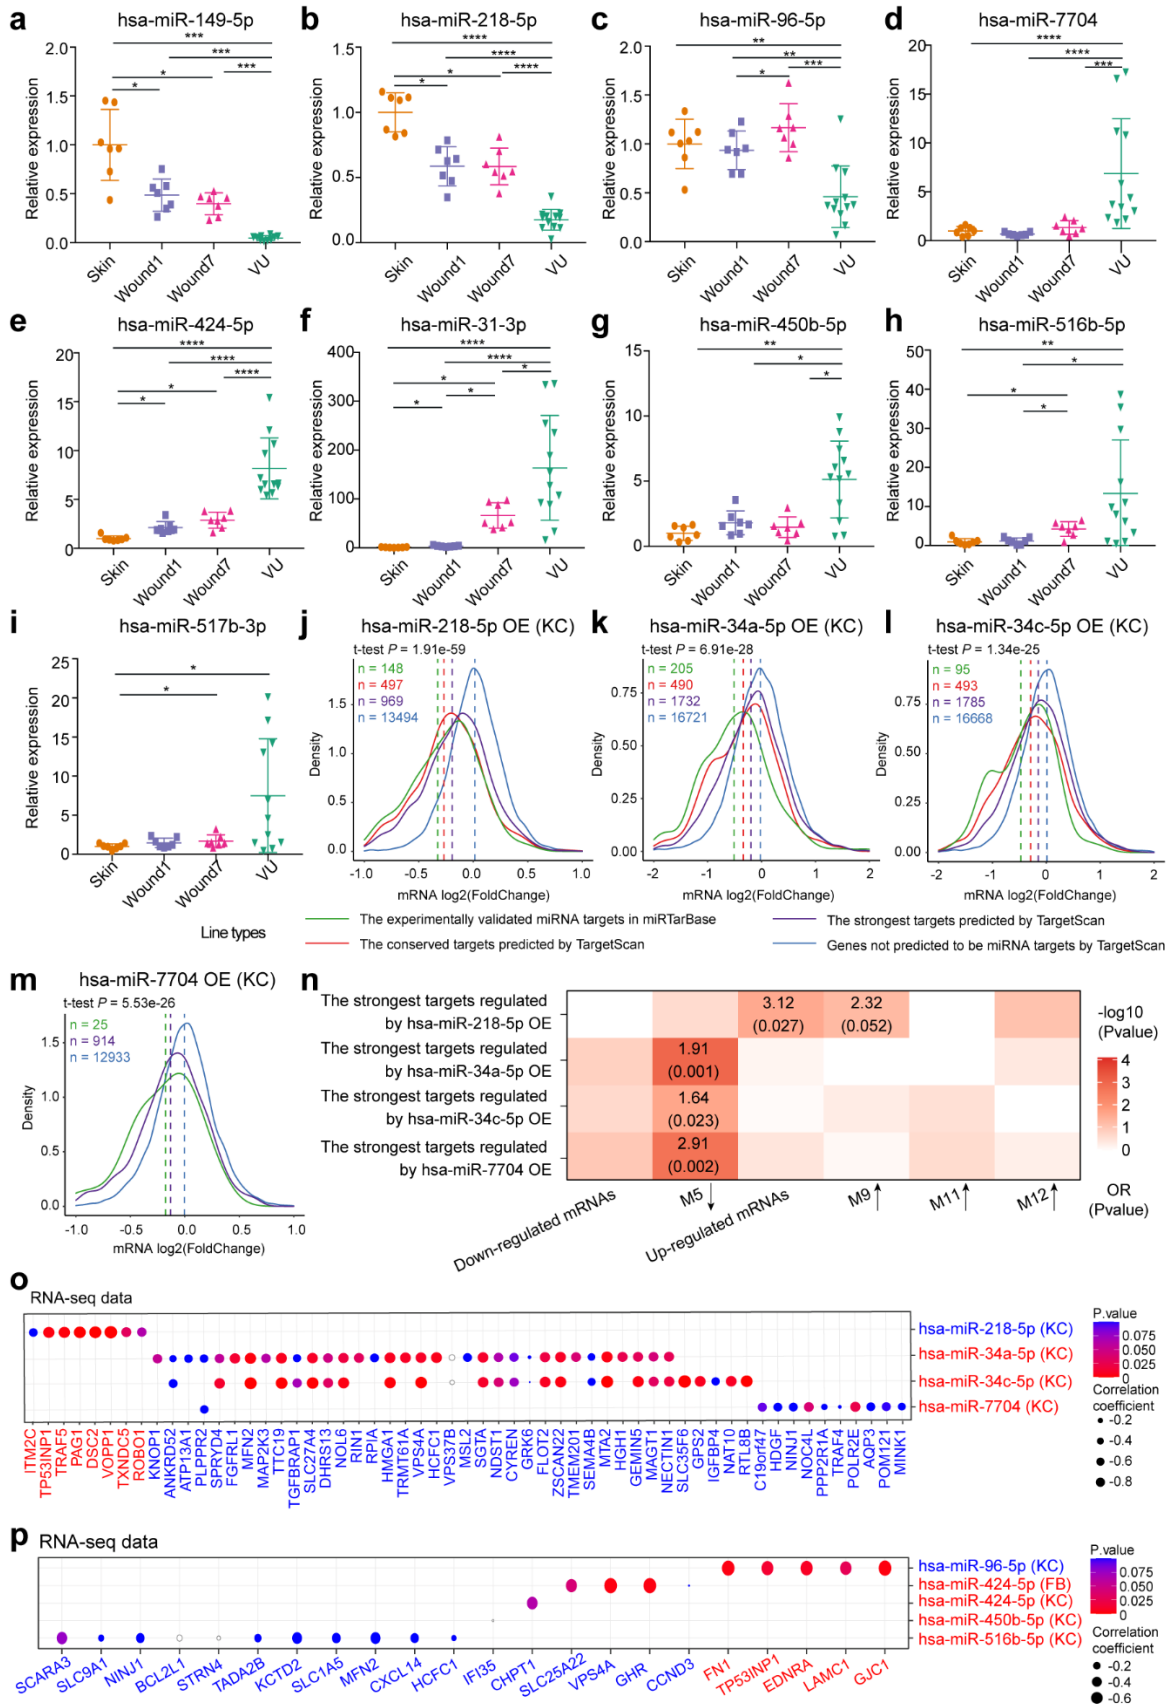

963

964

**Figure 5** Experimental validation of miRNAs' expression and targets in human skin wounds. a-i

965 qRT-PCR analysis of VU-associated DE miRNAs in the skin, day 1 and day 7 acute wounds from 7  
966 healthy donors and venous ulcers (VU) from 12 patients. Wilcoxon signed-rank test was used for the  
967 comparison between Skin, Wound1, and Wound7; Mann-Whitney U test was used for comparing VU  
968 with the skin and acute wounds. \* $P < 0.05$ , \*\* $P < 0.01$ , \*\*\* $P < 0.001$ , \*\*\*\* $P < 0.0001$ . **j-m** Microarray  
969 analysis was performed in keratinocytes (KC) with miR-218-5p (**J**), miR-34a-5p **k**, miR-34c-5p **l**, or miR-  
970 7704 **m** overexpression (OE), and density plots of mRNAs  $\log_2$ (fold change) are shown. Wilcoxon t-  
971 tests were performed to compare the TargetScan predicted strongest targets (purple) with the non-  
972 targets (blue) for each of these miRNAs. The conserved and experimentally validated targets are  
973 marked with red and green colors, respectively. Dotted lines depict the average  $\log_2$ (fold change)  
974 values for each mRNA group. **n** A heatmap shows the enrichment for VU-affected mRNAs and mRNA  
975 modules in the targets of miR-218-5p, miR-34a-5p, miR-34c-5p, or miR-7704 validated by the  
976 microarray analysis. Odds ratio (OR) and  $P$  values are shown when  $OR > 1$  and  $P\text{-value} < 0.05$  (Fisher's  
977 exact test). **o, p** For each of the miRNAs (miR-218-5p, miR-34a-5p, miR-34c-5p, miR-7704, miR-96,  
978 miR-424, miR-450b, and miR-516b) and its targets validated by the microarray analysis of KC or  
979 fibroblasts (FB), Pearson correlation analysis was performed between their expression values in human  
980 skin and wound samples shown by RNA-seq. Grey circles indicate correlation coefficients  $> 0$ .

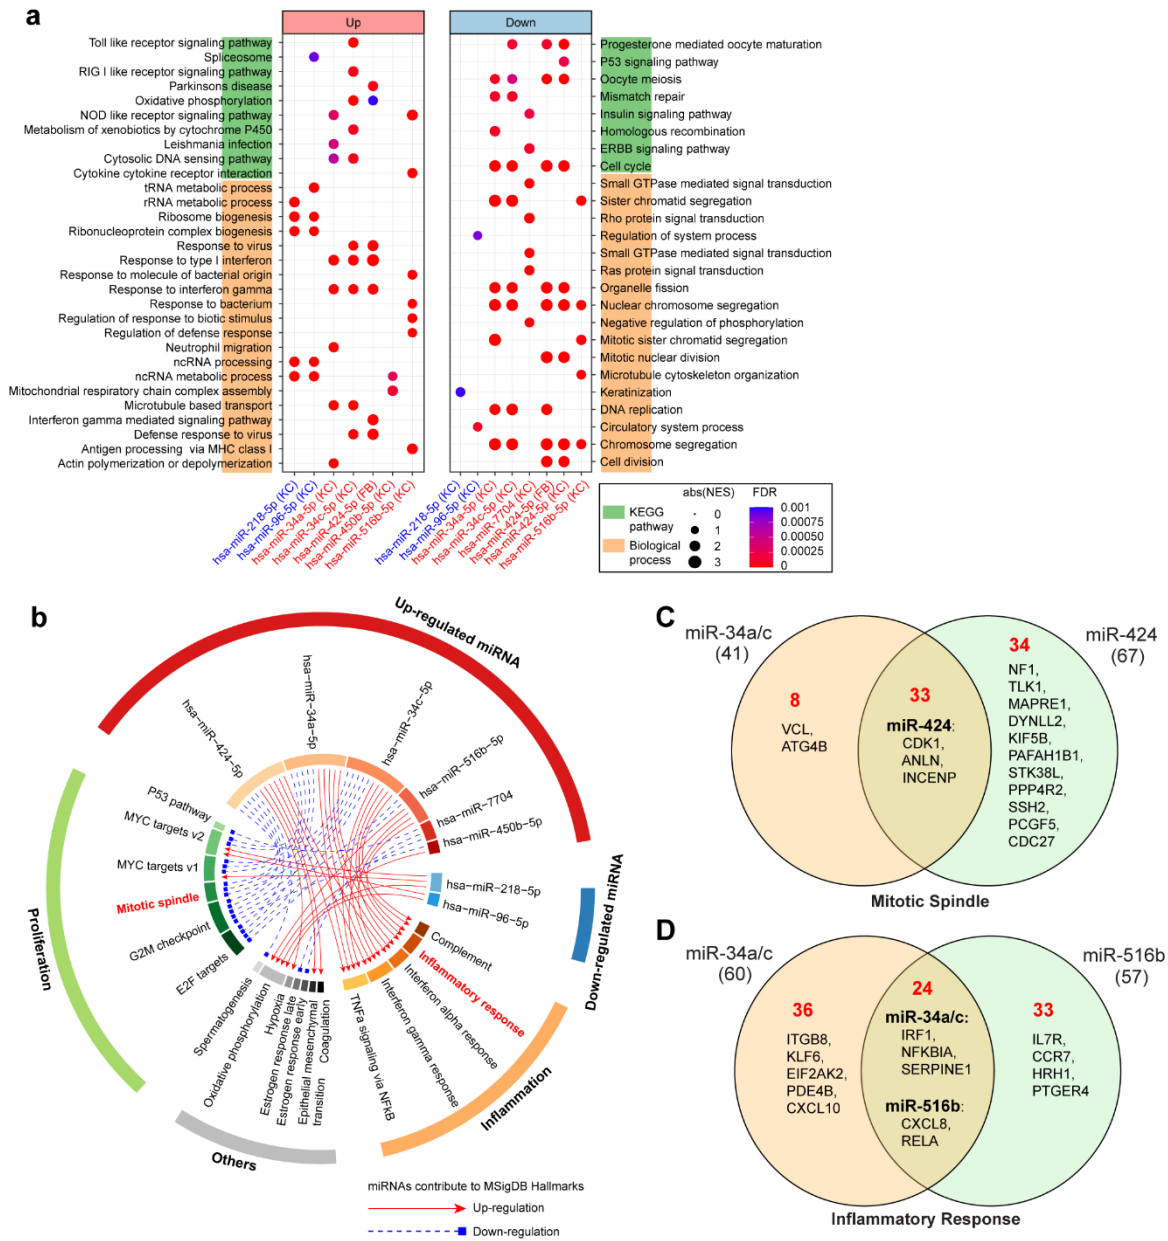

981

982 **Figure 6 Cooperativity of VU pathology-relevant miRNAs.** For the microarray data in keratinocytes

983 (KC) or fibroblasts (FB) with miR-218-5p, miR-96-5p, miR-34a-5p, miR-34c-5p, miR-7704, miR-424-5p,

984 miR-516-5p overexpression, we analyzed KEGG pathways, biological processes **a**, and Molecular

985 Signatures Database (MSigDB) hallmarks **b** enriched by the genes up-or down-regulated by these

986 miRNAs. Venn diagrams show the numbers of the mitotic spindle-related genes regulated by miR-

987 34a/c-5p and miR-424-5p **c** and the inflammatory response-related genes regulated by miR-34a/c-5p

988 and miR-516b-5p **d** (fold change > 1.2, *P*-value < 0.05) in the microarray analysis of keratinocytes



989 overexpressing these miRNAs. Among the regulated genes, the targets of each miRNA are depicted in  
990 the plots.

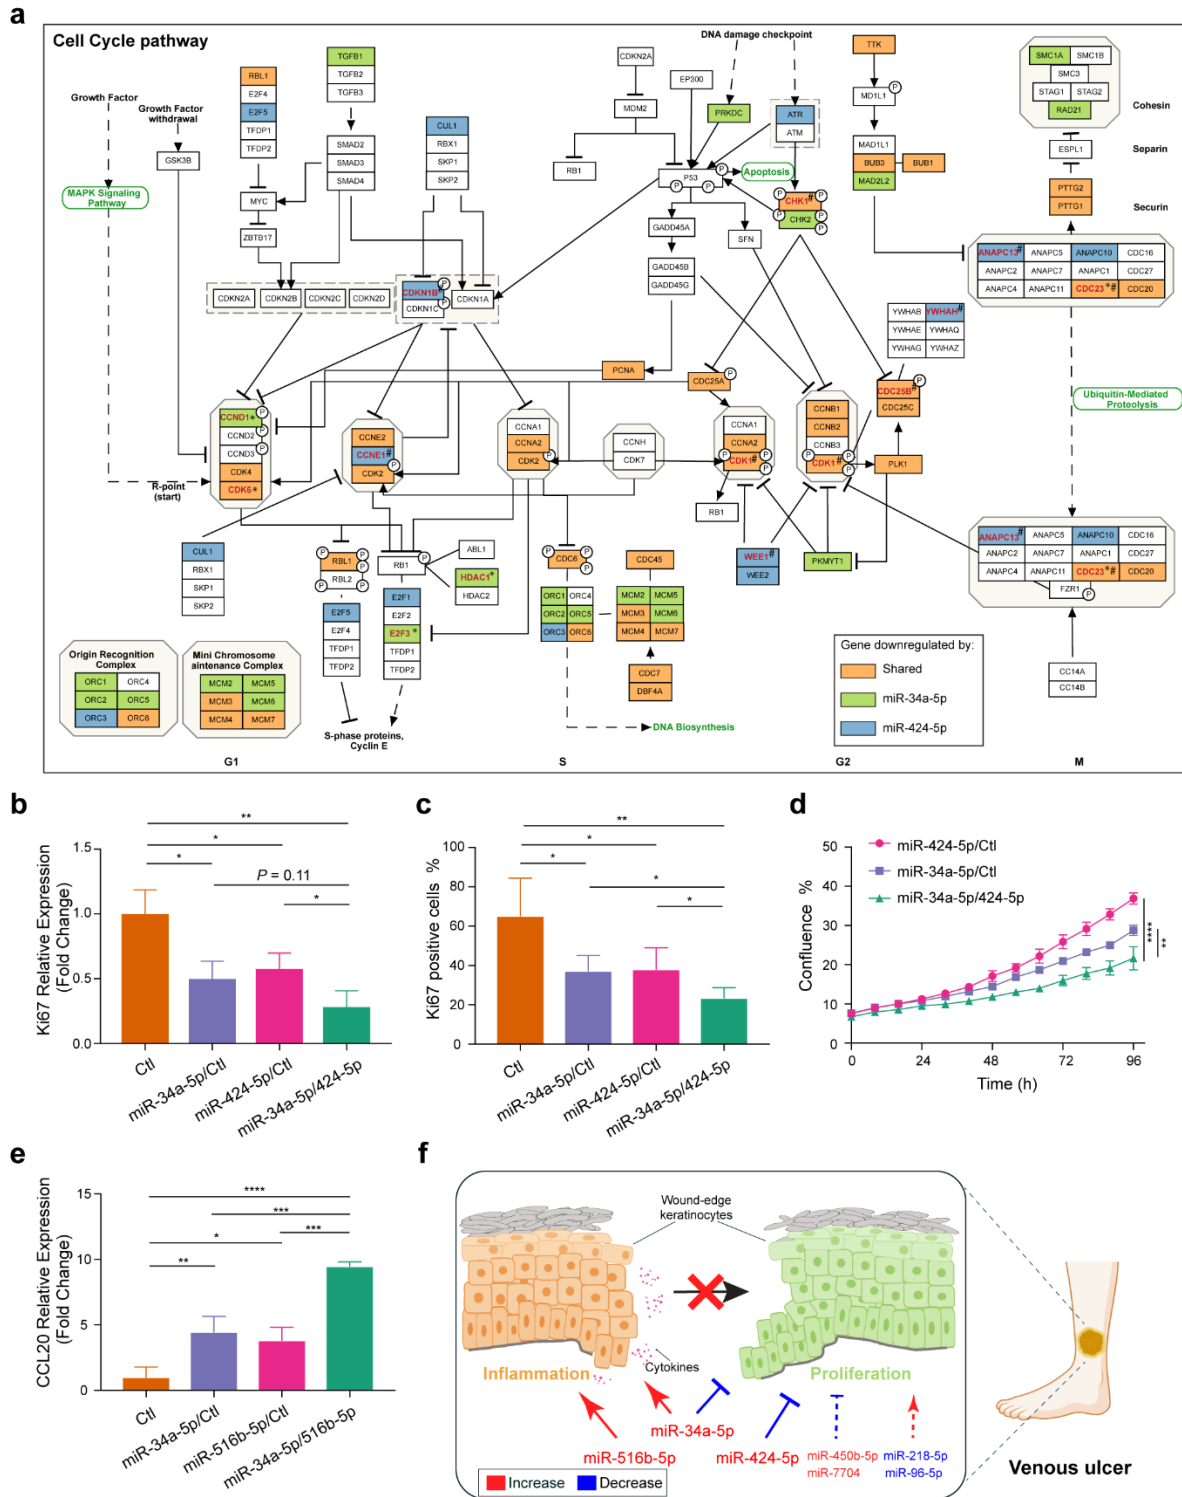

991

992 **Figure 7 Cooperation of miR-34a, miR-424, and miR-516 in regulating keratinocyte proliferation**

993 **and inflammatory response.** **a** In the KEGG cell cycle pathway map, genes regulated by miR-34a-5p

994 or miR-424-5p or both miRNAs as shown in the microarray analysis of keratinocytes are marked with

995 green, blue, and orange colors, respectively. Among the regulated genes, the miRNA targets are

996 highlighted in red and labeled with \* for miR-34a targets, # for miR-424 targets, \*\* for the gene co-  
997 targeted by both miRNAs. Ki67 expression was detected in keratinocytes transfected with miR-34a-5p  
998 or miR-424-5p mimics alone or both mimics for 24 hours (n = 3) by qRT-PCR **b** and  
999 immunofluorescence staining (n = 5 for Ctl and miR-34a-5p/424-5p, n = 4 for miR-34a-5p/ctl and miR-  
1000 424-5p/ctl) **c**. **d** The growth of the transfected keratinocytes (n = 3) was analyzed with a live cell imaging  
1001 system. **e** qRT-PCR analysis of CCL20 in keratinocytes transfected with miR-34a-5p or miR-516b-5p  
1002 mimics alone or both mimics for 24 hours (n = 3). **f** Proposed mechanism by which VU-dysregulated  
1003 miRNAs cooperatively contribute to the stalled wound healing characterized with failed inflammation-  
1004 proliferation transition. \* $P < 0.05$ ; \*\* $P < 0.01$ ; \*\*\* $P < 0.001$  and \*\*\*\* $P < 0.0001$  by unpaired two-tailed  
1005 Student's t-test **b**, **c**, and **e** and Two-way ANOVA **e**. Data are presented as mean  $\pm$  SD.

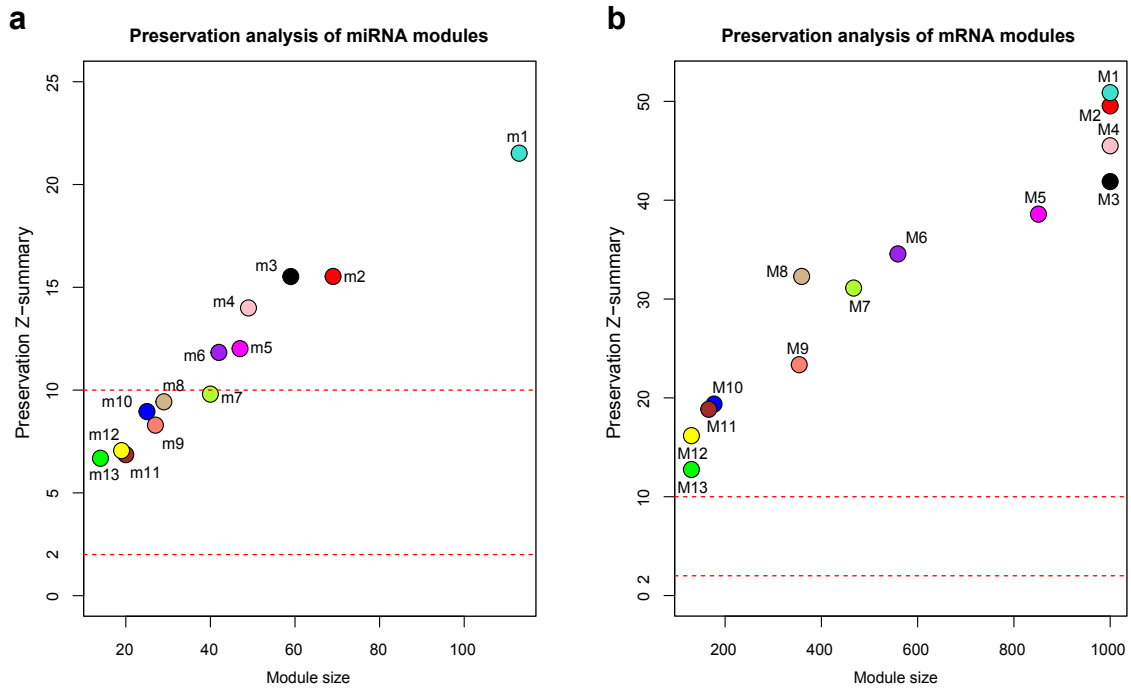

1006

1007 **Figure 2 - figure supplement 1 Preservation analysis of miRNA a and mRNA b co-expression**

1008 **modules.** The standardized Z-scores were calculated for each module by permutating 200 times using

1009 the 20 samples analyzed by RNA-seq as reference and test datasets. Modular preservation is strong if

1010 Z-summary > 10, weak to moderate if  $2 < Z\text{-summary} < 10$ , no evidence of preservation if Z-summary

1011  $\leq 2$ . miRNA modules.

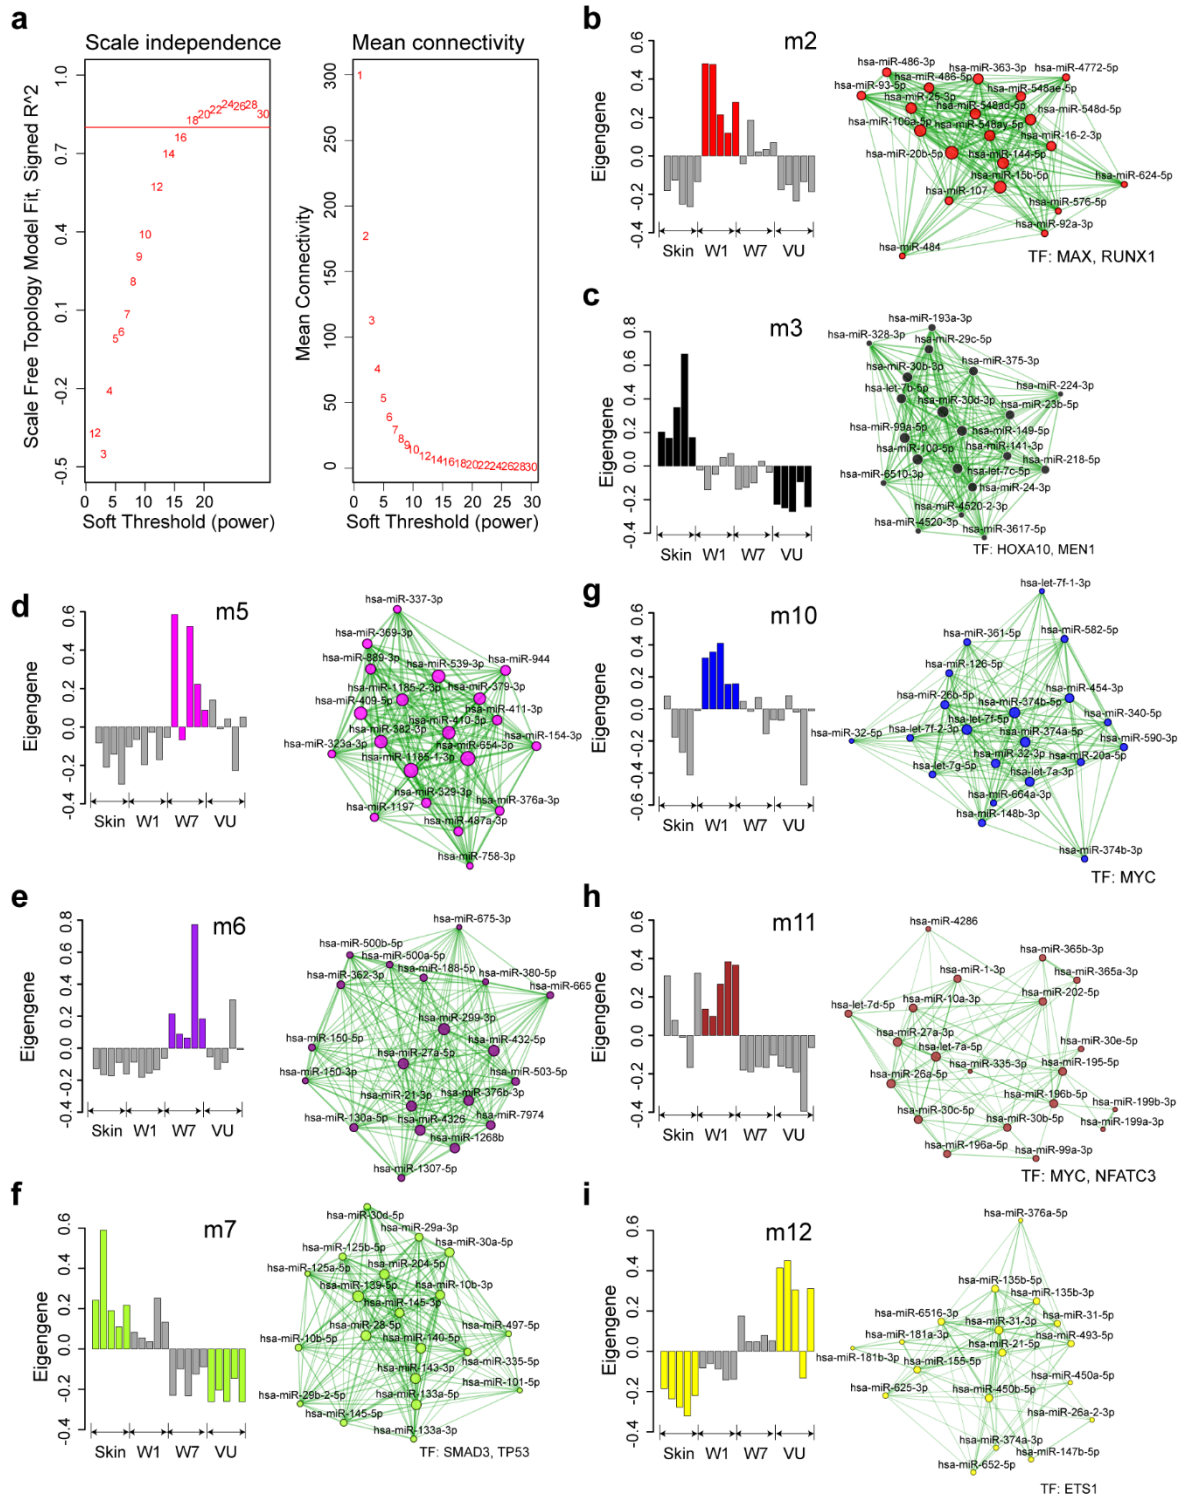

1012

1013

**Figure 2 - figure supplement 2 Weighted gene co-expression network analysis (WGCNA) of**

1014

**miRNAs in human skin wound healing (related to Figure 2a–d).**

1015

**a** The scale-free topology fit index

1016

(left) and mean connectivity (right) for various soft-threshold powers. The red line indicates signed  $R^2 =$

1017

**0.8.** **b–i** Bar plots (left) depict the ME values across the 20 samples analyzed by RNA-seq and network

plots (right) show the top 20 miRNAs with the highest kME values in each module. Node size and edge

1018 thickness are proportional to the kME values and the weighted correlations between two connected  
1019 miRNAs, respectively. Transcription factors (TFs) with their targets enriched in the modules (Fisher's  
1020 exact test:  $FDR < 0.05$ ) are listed below the networks.

1021

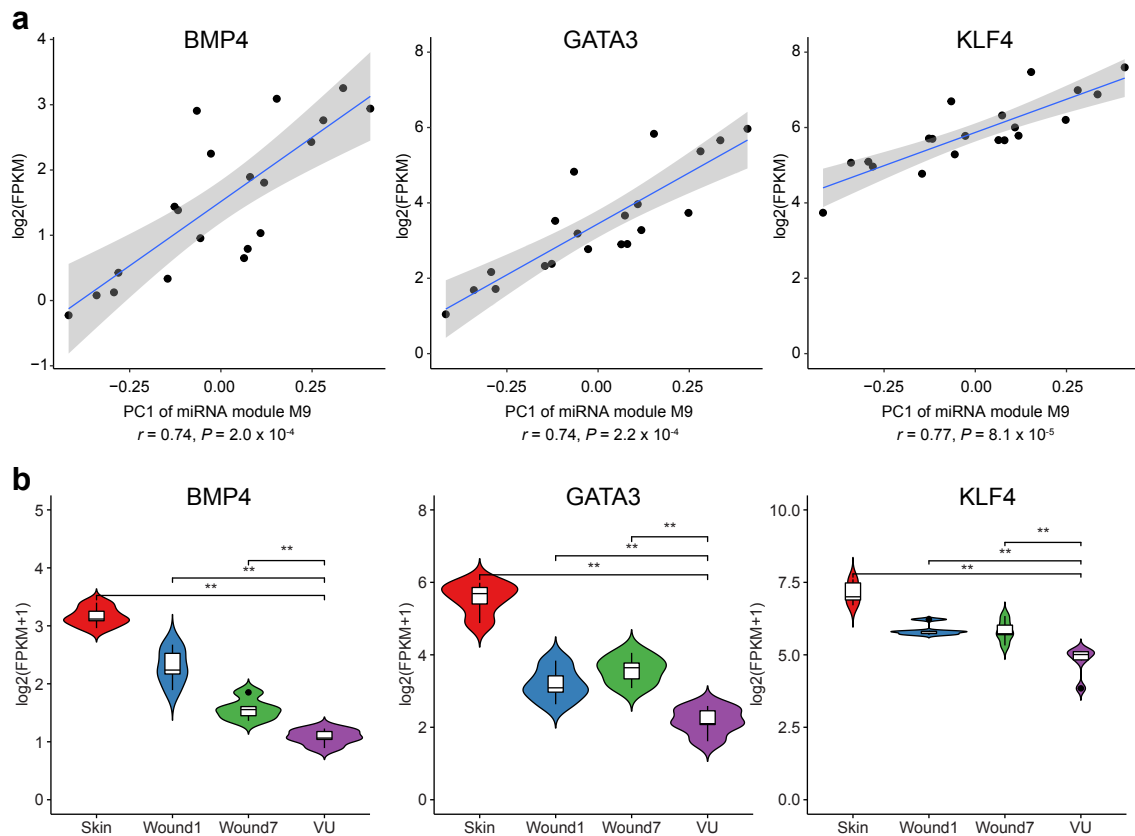

1022

1023 **Figure 2 - figure supplement 3 Transcription factors (TFs) with targets enriched in the miRNA**

1024 **m9 module. a** Pearson correlations between the first principal component (PC1) of miRNAs module

1025 m9 and the expression of BMP4, GATA3, or KLF4. **b** BMP4, GATA3, and KLF4 expression in the skin,

1026 day 1 and day 7 acute wounds from five healthy donors and in five venous ulcers analyzed by RNA-

1027 sequencing. Mann-Whitney t-test, \*\* $P < 0.01$ .

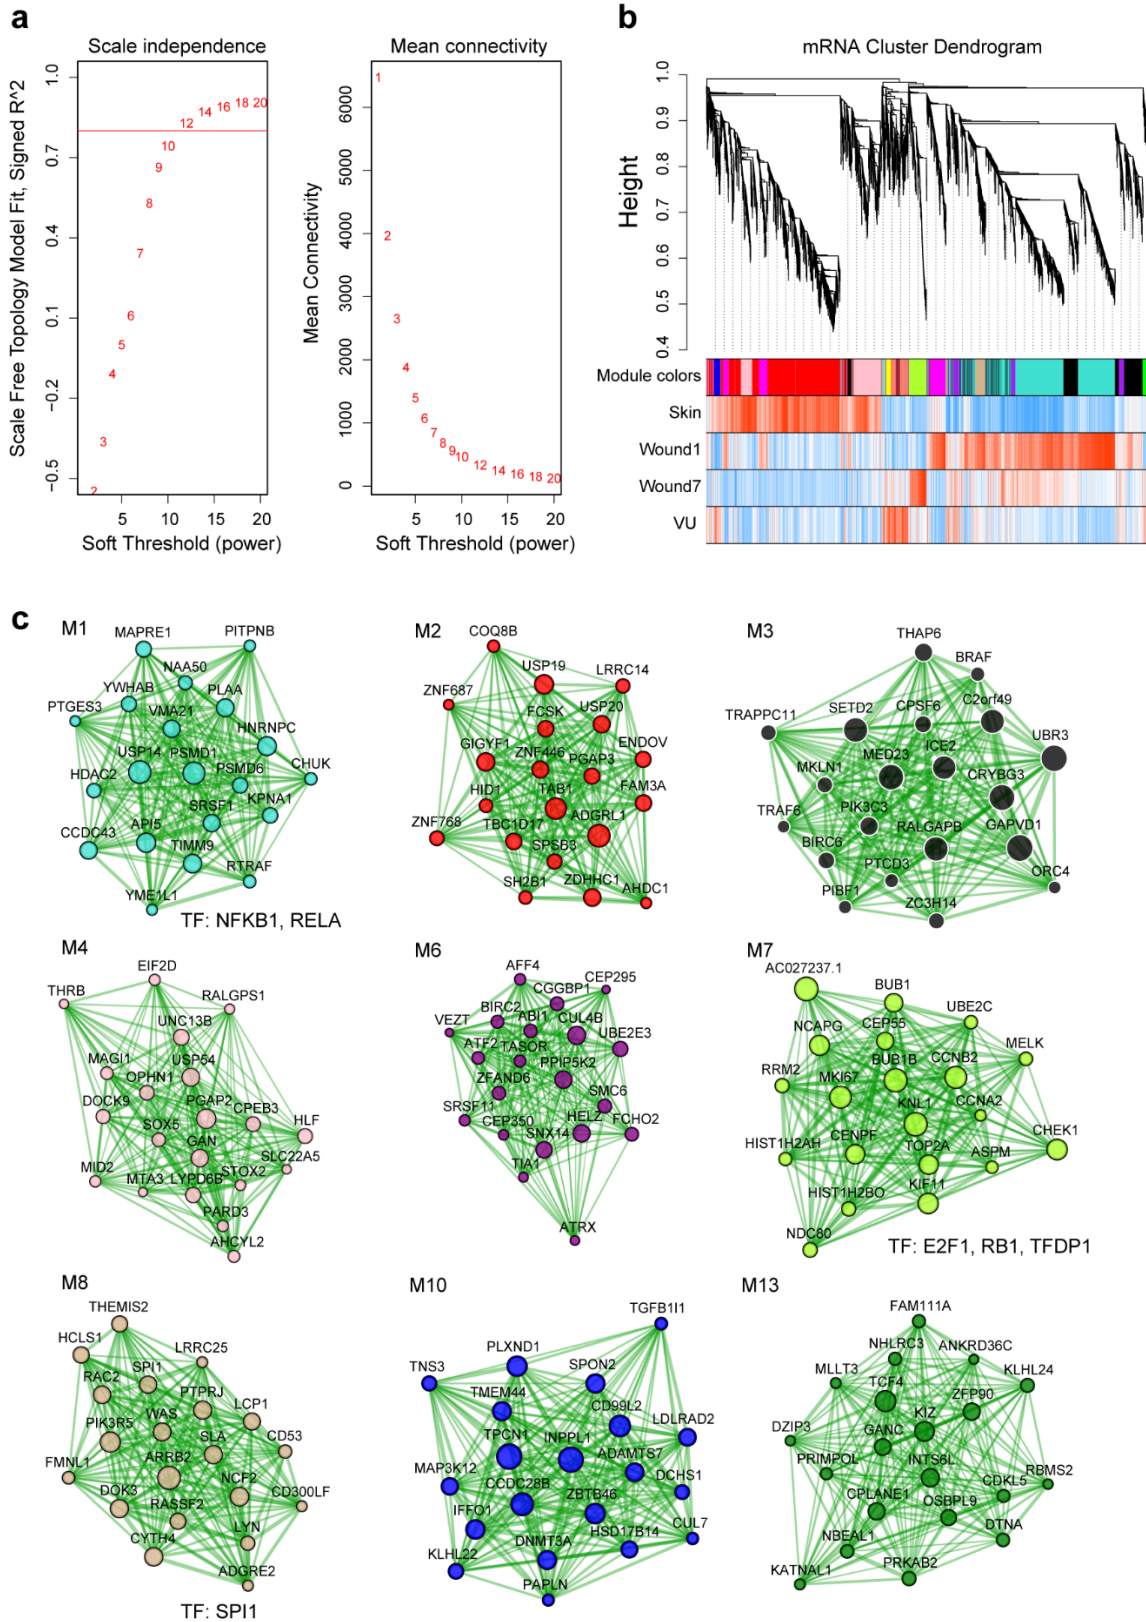

1028

1029

1030

1031

1032

**Figure 2 - figure supplement 4 Weighted gene co-expression network analysis (WGCNA) of mRNAs in human skin wound healing (related to Figure 2e).** **a** The scale-free topology fit index (left) and mean connectivity (right) for various soft-threshold powers. The red line indicates signed  $R^2 = 0.8$ . **b** Cluster dendrogram shows mRNA co-expression modules: each branch corresponds to a module,



1033 and each leaf indicates a single miRNA. Color bars below show the module assignment (the 1<sup>st</sup> row)  
1034 and Pearson correlation coefficients between mRNA expression and the sample groups (the 2<sup>nd</sup> to the  
1035 5<sup>th</sup> row: red and blue lines represent positive and negative correlations, respectively). **c** Network plots  
1036 of mRNA modules: the top 20 mRNAs with the highest kME values in each module were plotted in the  
1037 networks. Node size and edge thickness are proportional to the kME values and the weighted  
1038 correlations between two connected mRNAs, respectively. Transcription factors (TFs) with their targets  
1039 enriched in the modules (Fisher's exact test: FDR < 0.05) are listed below the networks.

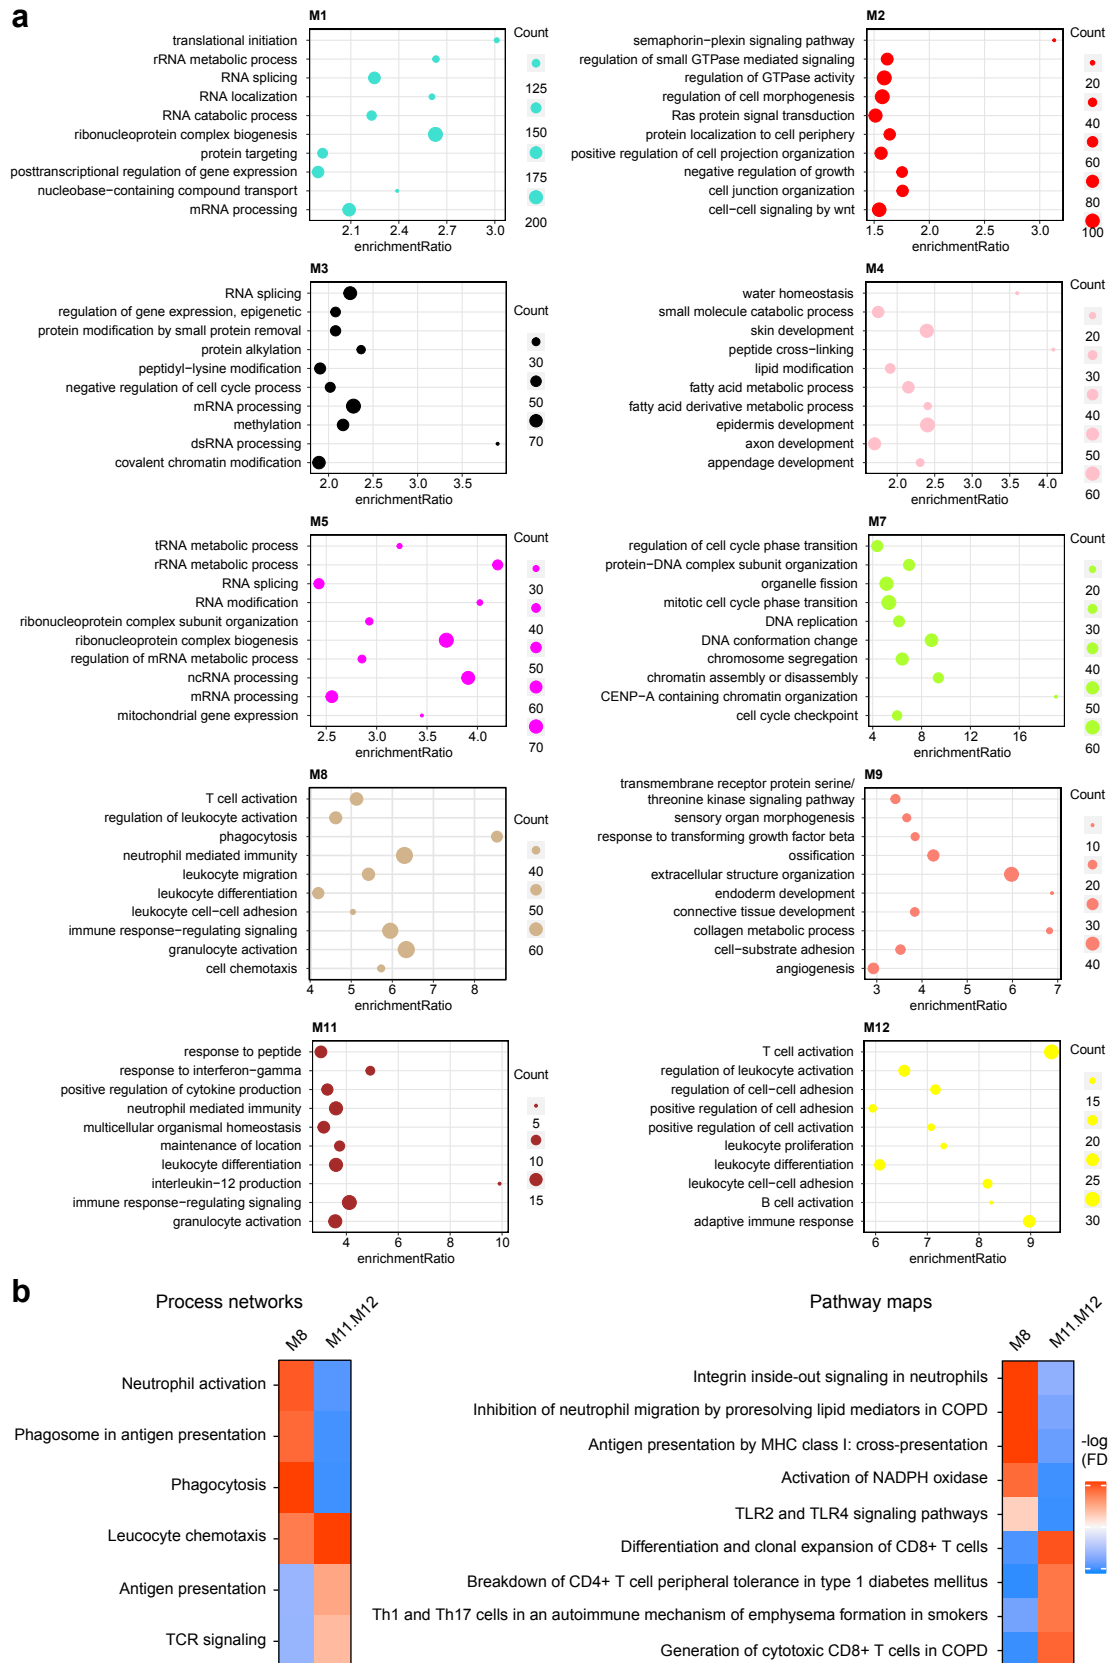

1040

1041 **Figure 2 - figure supplement 5 Functional enrichment analysis for mRNA modules. a** The top ten

1042 gene ontology (GO) terms with FDR less than 0.05 are shown for each module (related to **Figure 2f**).

1043 **b** MetaCore analysis based on a curated database identified the process networks (left) and pathway  
1044 maps (right) enriched in the M8 or the combined M11.M12 modules, respectively.

### miR-mediated gene regulatory network in VU

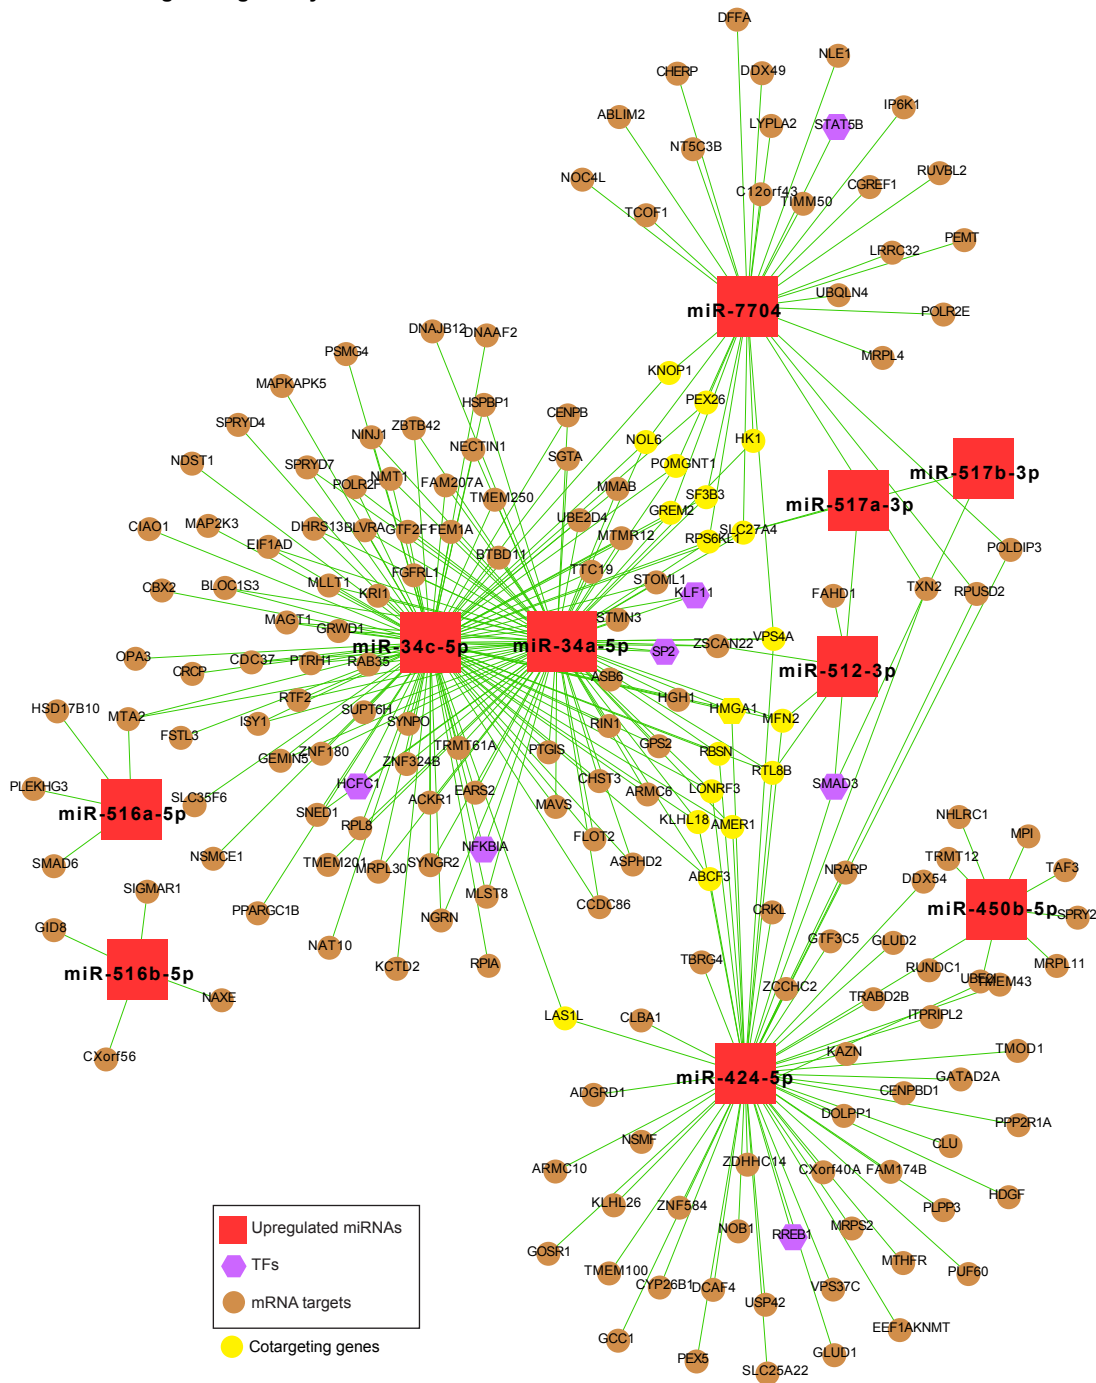

1045

1046

1047

1048

1049

1050

1051

**Figure 4 – figure supplement 1** MiR-mediated gene regulatory network in VU, which is constructed with the upregulated miRNAs in **Figure 4b**, the mRNAs predicted as the strongest targets and with anti-correlated expression patterns (Pearson correlation,  $P$ -value < 0.05 and  $r$  < 0) with these miRNAs in human wounds, and the transcription factors (TFs) regulating these miRNAs' expression from the TransmiR v2 database (related to **Figure. 4b–c** and **Additional file 8**). The mRNAs co-targeted by miRNAs with unrelated seed sequences are highlighted in yellow.

### miR-mediated gene regulatory network in VU

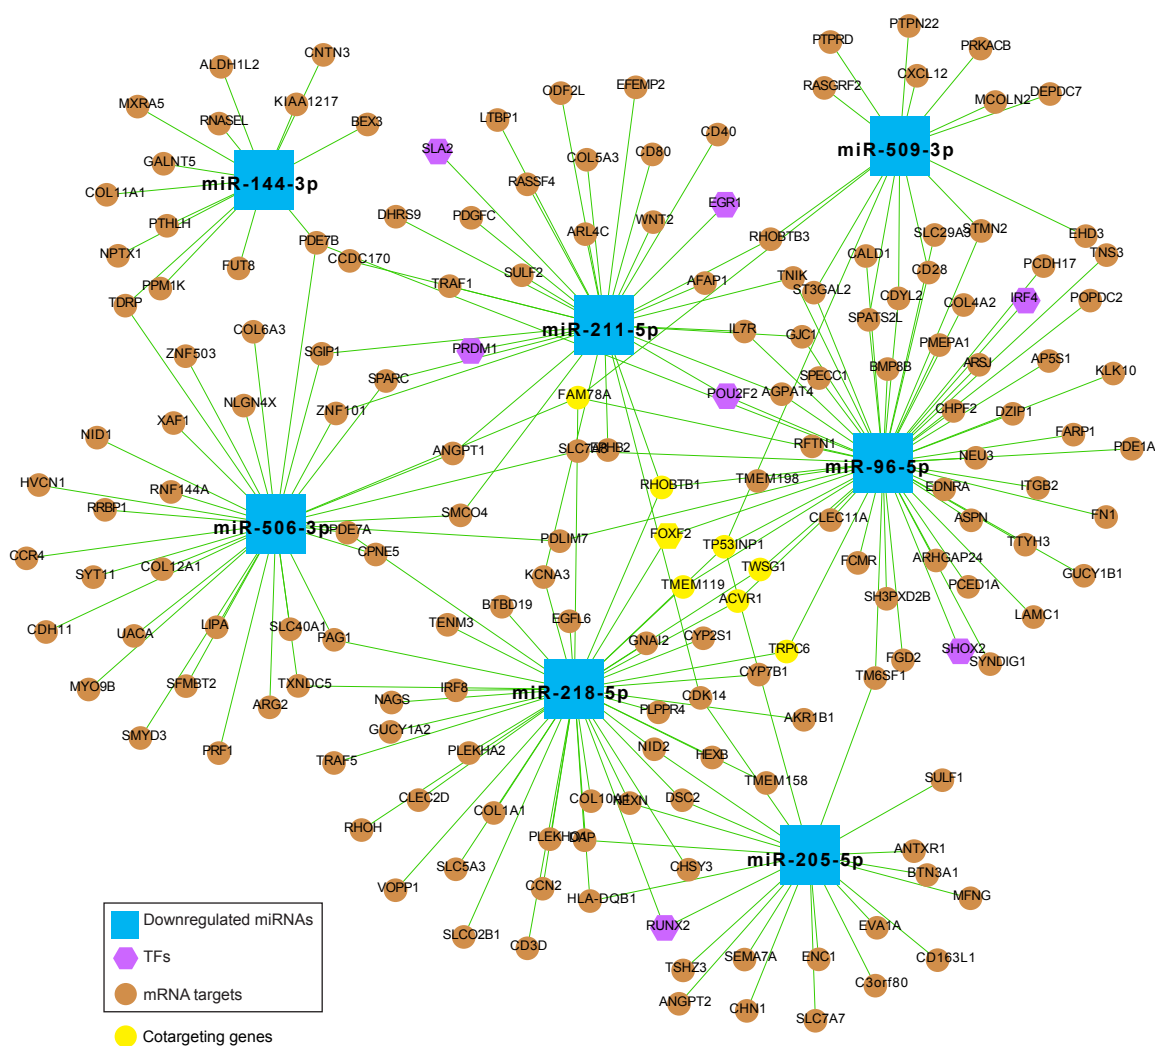

1052

1053

1054

1055

1056

1057

1058

**Figure 4 – figure supplement 2 MiR-mediated gene regulatory network in VU**, which is constructed with the downregulated miRNAs in **Figure 4b**, the mRNAs predicted as the strongest targets and with anti-correlated expression patterns (Pearson correlation,  $P$ -value < 0.05 and  $r$  < 0) with these miRNAs in human wounds, and the transcription factors (TFs) regulating these miRNAs' expression from the TransmiR v2 database (related to **Figure 4b–c** and **Additional file 8**). The mRNAs co-targeted by miRNAs with unrelated seed sequences are highlighted in yellow.

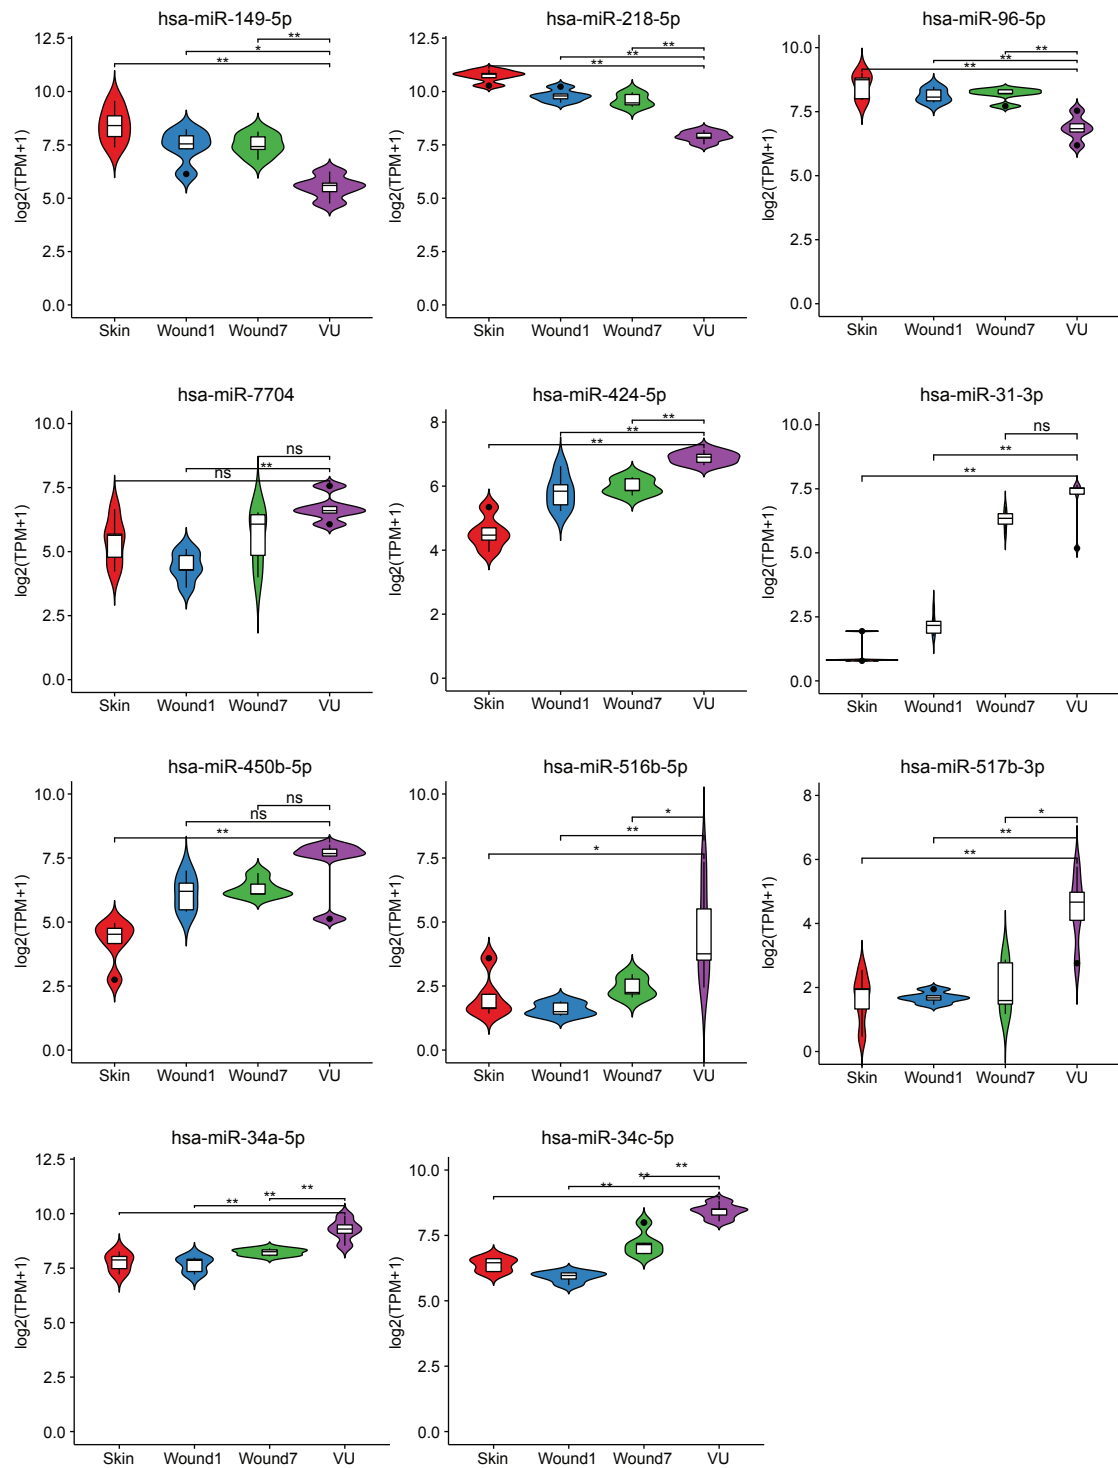

1059

1060 **Figure 5 – figure supplement 1 RNA-sequencing results for the miRNAs selected for**

1061 **experimental validation. Mann-Whitney t-test, \* $P < 0.05$ , \*\* $P < 0.01$ , ns: not significant.**

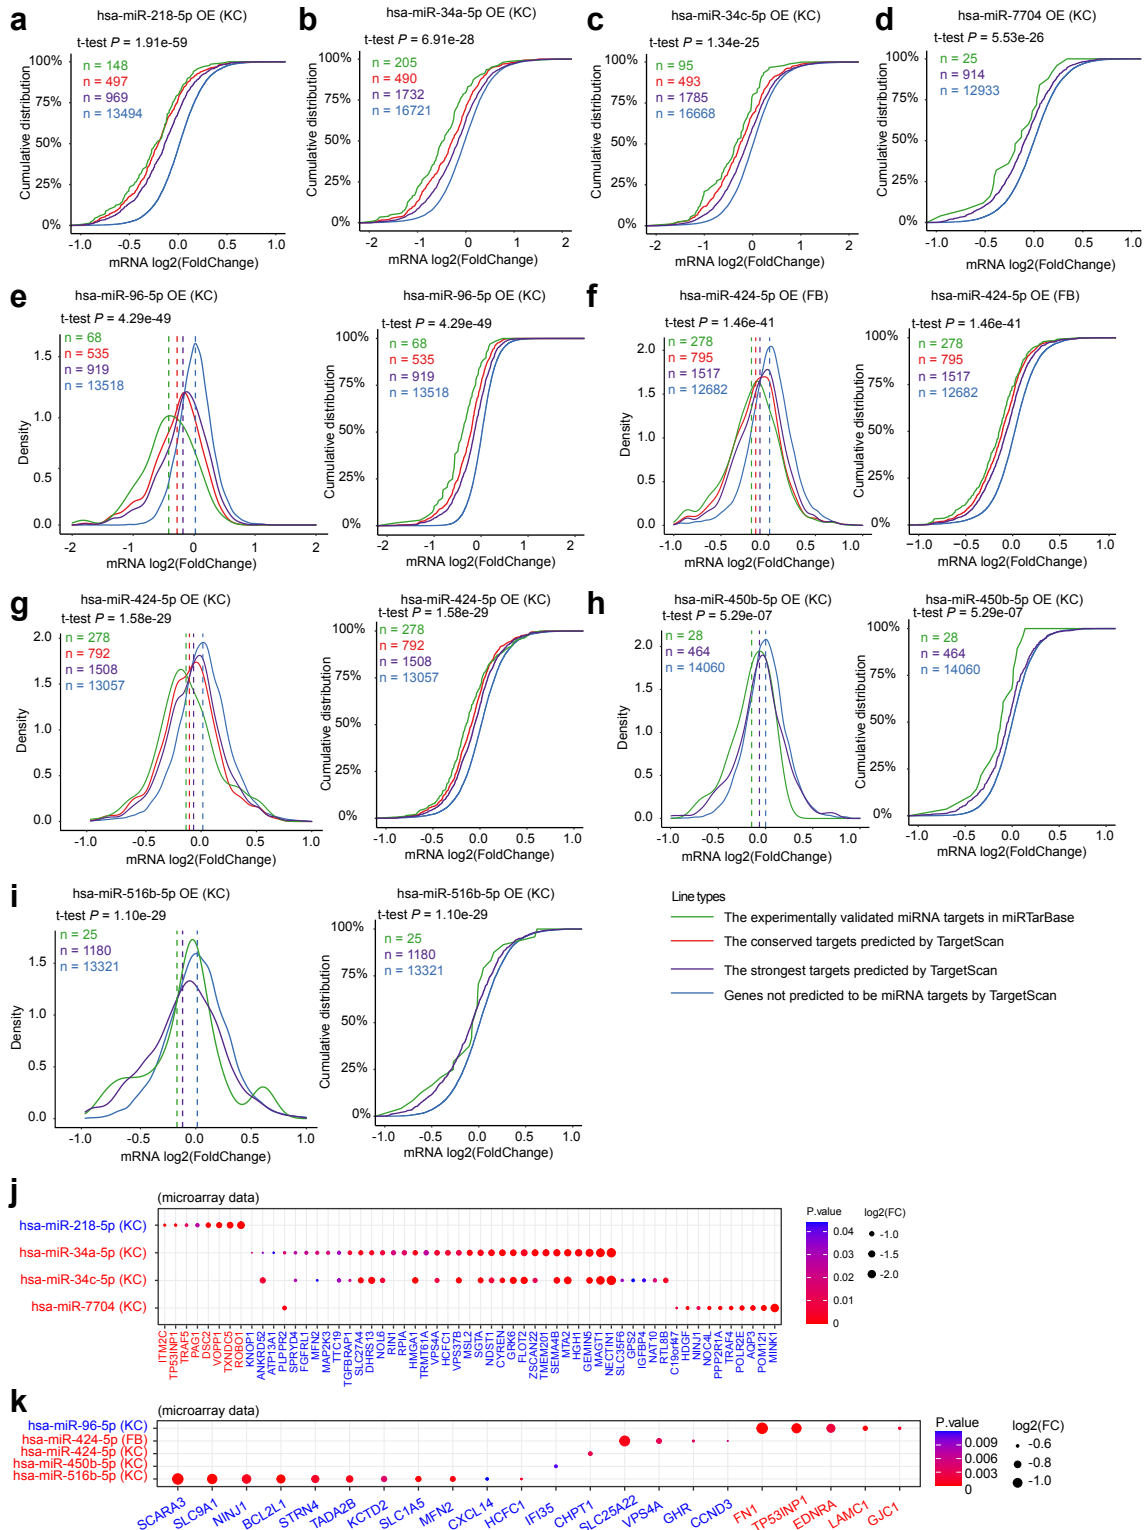

1062

1063

1064

1065

1066

**Figure 5 – figure supplement 2 Experimental validation of miRNAs' targetome.** Microarray analysis was performed in keratinocytes (KC) or fibroblasts (FB) with miR-218-5p (a), miR-34a-5p (b), miR-34c-5p (c), miR-7704 OE (d), miR-96-5p (e), miR-424-5p (f, g), miR-450-5p (h), or miR-516-5p (i) overexpression (OE). Density plots (left) and cumulative distributions (right in e–i) of mRNA log<sub>2</sub>(fold

1067 change) are shown. Wilcoxon t-tests were performed to compare the TargetScan predicted strongest  
1068 targets (purple) with the non-targets (blue) for each of these miRNAs. The conserved and  
1069 experimentally validated targets are marked with red and green colors, respectively. Dotted lines depict  
1070 the average  $\log_2(\text{fold change})$  values for each mRNA group. **j, k** The target mRNAs are significantly  
1071 changed (fold change  $< -1.2$  and  $P$ -value  $< 0.05$ ) by the indicated miRNAs in the microarray analysis.



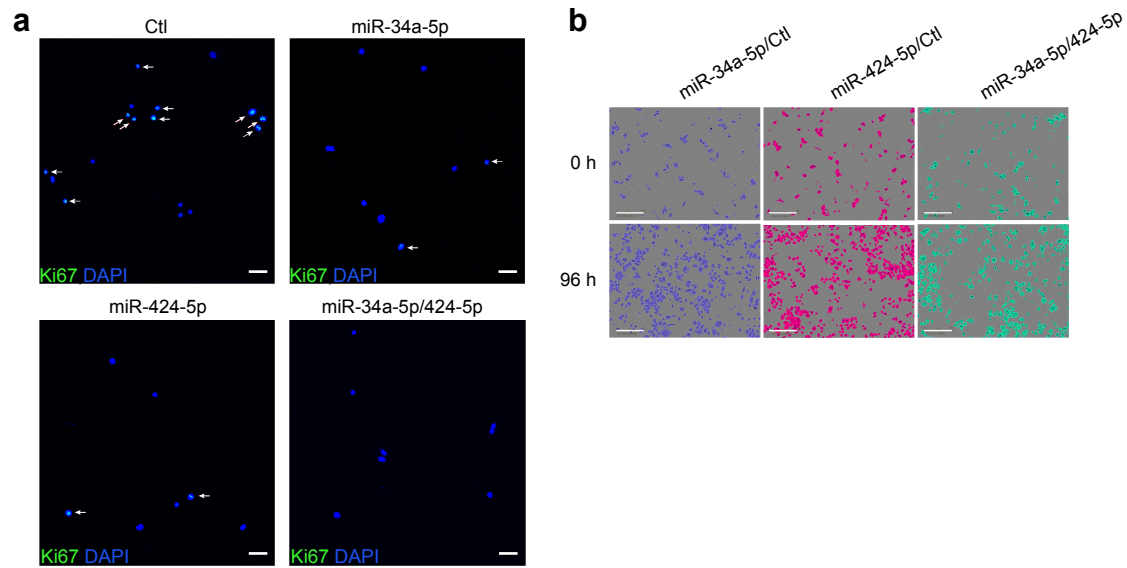

1072

1073

1074

1075

1076

1077

1078

1079

**Figure 7 – supplement figure 1 Cooperation of miR-34a and miR-424 in regulating keratinocyte proliferation.** **a** Ki67 expression was detected in keratinocytes transfected with miR-34a-5p or miR-424-5p mimics alone or both mimics for 24 hours by immunofluorescence staining. Cell nuclei were costained with DAPI. Ki67+ cell nuclei are highlighted with white arrows in the representative photographs. (Scale bar: 50  $\mu$ m.) **b** The growth of the transfected keratinocytes (n = 3) was analyzed with a live cell imaging system, and representative photographs of cells at 0 and 96 hours are shown (Scale bar, 300  $\mu$ m.).

**Table 1. Characteristics of the healthy donors and the VU patients.**

| <b>Characteristics</b>       | <b>Healthy donors</b>            | <b>Patients with VU</b> |
|------------------------------|----------------------------------|-------------------------|
| Study population (n)         | 10                               | 12                      |
| Age, years (mean $\pm$ s.d.) | 65.3 $\pm$ 3.2                   | 75.8 $\pm$ 12.0         |
| Ethnicity                    | White                            | White                   |
| Gender (male: female)        | 2:8                              | 5:7                     |
| Biopsy location              | Lower leg                        | Lower leg               |
| Wound duration               | Acute (1 or 7 days after injury) | 3.7 $\pm$ 5.3 years     |

Abbreviations: s.d., standard deviation; VU, venous ulcer.

1080

1081 **Table 2. Characteristics of the patients with venous ulcer.**

| Patient | Sex | Age (years) | Ethnicity | Wound size (cm) | Wound duration (years) | Wound location | Experiment        |
|---------|-----|-------------|-----------|-----------------|------------------------|----------------|-------------------|
| 1       | M   | 86          | Caucasian | 6x5             | 4                      | Lower leg      | RNA-seq & qRT-PCR |
| 2       | F   | 68          | Caucasian | 15x15           | 2                      | Lower leg      | RNA-seq & qRT-PCR |
| 3       | M   | 70          | Caucasian | 3x0.5           | 0.3                    | Lower leg      | RNA-seq & qRT-PCR |
| 4       | F   | 78          | Caucasian | 15x12           | 1.5                    | Lower leg      | RNA-seq & qRT-PCR |
| 5       | F   | 87          | Caucasian | 3x2+8x4         | 2.5                    | Lower leg      | RNA-seq & qRT-PCR |
| 6       | F   | 73          | Caucasian | 3x4             | 3.5                    | Lower leg      | qRT-PCR           |
| 7       | M   | 99          | Caucasian | 20x10           | 0.5                    | Lower leg      | qRT-PCR           |
| 8       | F   | 71          | Caucasian | 20x20           | 20                     | Lower leg      | qRT-PCR           |
| 9       | F   | 77          | Caucasian | 2.5x3+15x15     | 4.5                    | Lower leg      | qRT-PCR           |
| 10      | M   | 51          | Caucasian | 2x1.5           | 3                      | Lower leg      | qRT-PCR           |
| 11      | M   | 69          | Caucasian | 12x15           | 1                      | Lower leg      | qRT-PCR           |
| 12      | F   | 81          | Caucasian | 7x2.5           | 1                      | Lower leg      | qRT-PCR           |

1082 Abbreviations: M, male; F, female.

1083 **Table 3. Characteristics of the healthy donors.**

| <b>Donor</b> | <b>Sex</b> | <b>Age (years)</b> | <b>Ethnicity</b> | <b>Wound location</b> | <b>Experiment</b> |
|--------------|------------|--------------------|------------------|-----------------------|-------------------|
| 1            | F          | 66                 | Caucasian        | Lower leg             | RNA-seq           |
| 2            | M          | 69                 | Caucasian        | Lower leg             | RNA-seq           |
| 3            | F          | 67                 | Caucasian        | Lower leg             | RNA-seq           |
| 4            | M          | 69                 | Caucasian        | Lower leg             | RNA-seq & qRT-PCR |
| 5            | F          | 64                 | Caucasian        | Lower leg             | RNA-seq & qRT-PCR |
| 6            | F          | 60                 | Caucasian        | Lower leg             | qRT-PCR           |
| 7            | F          | 66                 | Caucasian        | Lower leg             | qRT-PCR           |
| 8            | F          | 60                 | Caucasian        | Lower leg             | qRT-PCR           |
| 9            | F          | 67                 | Caucasian        | Lower leg             | qRT-PCR           |
| 10           | F          | 65                 | Caucasian        | Lower leg             | qRT-PCR           |

1084 Abbreviations: M, male; F, female.

1085 **Video 1. Keratinocyte growth was analyzed with a live cell imaging system.** 1, Keratinocytes co-  
1086 transfected with miR-34a-5p and control mimics. 2, Keratinocytes co-transfected with miR-424-5p and  
1087 control mimics. 3, Keratinocytes co-transfected with miR-34a-5p and miR-424-5p mimics.

1088

1089 **Additional file 1.** Source data for miRNAs (related to **Figure 1c, d**) and mRNA (related to **Figure 1e**)  
1090 with expression change specifically in venous ulcers.

1091

1092 **Additional file 2.** Source data for weighted gene co-expression network analysis of miRNAs in wound  
1093 healing. (related to **Figure 2a, b**)

1094

1095 **Additional file 3.** Source data for the top 20 driver miRNAs of each significant module in WGCNA.  
1096 (related to **Figure 2c, d** and **Figure supplements 2-2**)

1097

1098 **Additional file 4.** Source data for transcription factors (TF) regulating miRNA expression in each  
1099 module. (related to **Figure 2c, d** and **Figure supplements 2-2b-2i**)

1100

1101 **Additional file 5.** Source data for weighted gene co-expression network analysis of mRNAs in wound  
1102 healing. (related to **Figure 2e**)

1103

1104 **Additional file 6.** Source data for transcription factors (TF) with targets enriched in significant mRNA  
1105 modules. (related to **Figure supplements 2-4c**)

1106

1107 **Additional file 7.** Source data for gene set enrichment analysis for VU-affected DE mRNAs and mRNA  
1108 modules in the strongest targets of VU-associated DE miRNAs and miRNA modules. (related to **Figure**  
1109 **4a**)

1110

1111 **Additional file 8.** Source data for the individual candidate miRNAs with their targets enriched for the  
1112 VU mRNA signature. (related to **Figure 4b**)

1113

1114 **Additional file 9.** Source data for experimental validation of miRNAs' expression in human skin wounds  
1115 (related to **Figure 5a-i**), enrichment analysis of the experimentally validated miRNA targets for the  
1116 venous ulcer (VU) gene signature (related to **Figure 5n**), and miRNA targets validated by the microarray  
1117 and in VU gene signature (related to **Figure supplements 5-2j, 2k**).

1118

1119 **Additional file 10.** Source data for gene ontology analysis of the miRNA-regulated genes in the  
1120 microarray data. (related to **Figure 6**)

1121

1122 **Additional file 11.** Source data for cooperation of miR-34a, miR-424, and miR-516 in regulating  
1123 keratinocyte proliferation and inflammatory response. (related to **Figure 7b-e**)

1124

1125 **Table S1.** Quality control of small RNA sequencing data.

1126

1127 **Table S2.** Quality control of rRNA-depleted total RNA sequencing data.
